# Supplementary material for: Understanding public drug procurement in India: a comparative qualitative study of five Indian states
Source: PubMed Central journal article supplement — BMJ Open. 2013 Feb 5;3(2):e001987. doi: 10.1136/bmjopen-2012-001987 (PMC3585974; doi:10.1136/bmjopen-2012-001987), 2013-02-05
Supplement: bmjopen-2012-001987.draft_revisions.pdf [file bmjopen-2012-001987.draft_revisions.pdf]

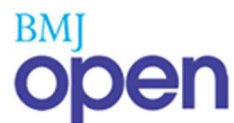

**Understanding public drug procurement in India – A comparative study of five Indian states**

|                                 |                                                                                                                                                                                                          |
|---------------------------------|----------------------------------------------------------------------------------------------------------------------------------------------------------------------------------------------------------|
| Journal:                        | <i>BMJ Open</i>                                                                                                                                                                                          |
| Manuscript ID:                  | bmjopen-2012-001987                                                                                                                                                                                      |
| Article Type:                   | Research                                                                                                                                                                                                 |
| Date Submitted by the Author:   | 27-Aug-2012                                                                                                                                                                                              |
| Complete List of Authors:       | Singh, Prabal; ACCESS Health International, Tatambhotla, Anand; ACCESS Health International, Kalvakuntla, Rohini; ACCESS Health International, Chokshi, Maulik; Indian Institute of Public Health Delhi, |
| <b>Primary Subject Heading</b>: | Health policy                                                                                                                                                                                            |
| Secondary Subject Heading:      | Health policy                                                                                                                                                                                            |
| Keywords:                       | Health policy < HEALTH SERVICES ADMINISTRATION & MANAGEMENT, Organisation of health services < HEALTH SERVICES ADMINISTRATION & MANAGEMENT, PUBLIC HEALTH                                                |
|                                 |                                                                                                                                                                                                          |

SCHOLARONE™  
Manuscripts

## Title

Understanding public drug procurement in India – A comparative study of five Indian states

## Abstract

India is in the midst of metamorphosis of its health policies to achieve universal healthcare and access to essential medicines is one of its critical mandates. Much discussion has risen on the need to strengthen the public drug procurement systems at the state levels in order to ensure good quality and timely supply of essential drugs at all public health facilities. Different states in India follow different public procurement systems ranging from centralized pooled procurement to decentralized procurement. This study aims to compare and contrast the different procurement models and their detailed implications on price of the drugs procured, supply-chain management, cost-effectiveness of the system in order to provide some key points to policy makers. The finer differences between the state models, even though seemingly similar from the outside impact access to medicines for people hugely and this has been captured in the study. The five states for the study- Tamil Nadu, Kerala, Odisha, Punjab and Maharashtra were chosen to ensure heterogeneity in a number of factors: a) Procurement Type; b) Autonomy of the procurement organization; c) State of public health infrastructure and d) Public health care budgets. The methodology adopted for this study is based on both secondary data and primary data collected from state procurement cells and also from 4 facilities- a district hospital, a taluk hospital, Community healthcare center and Primary healthcare center in each state. The procurement processes in each state were compared across 52 process related factors and on price of the drugs procured. Such a detailed analysis revealed that autonomous procurement organizations were more efficient in relation to payments to suppliers, had relatively lower drug procurement prices and managed their inventory more scientifically. The tables showcased in the study reveals some interesting correlations between process parameters and efficiency of the systems; some intuitive as well as counter intuitive observations that need to be further probed into. In a way, this study raises more questions and seeks the need for further research in this arena.

## ARTICLE SUMMARY

### Article focus

Compare and contrast different procurement models and their impact on prices, cost effectiveness of the system and supply chain management.

### Key messages

Autonomous procurement organizations were more efficient in relation to payments to suppliers, had relatively lower drug procurement prices and managed their inventory more scientifically.

### Strengths

One of the first studies to compare and contrast public drug procurement systems across different states in India

### Limitations

- Time and resource constraints have limited our primary data to one or two districts in each State. However, efforts were made to include both urban and rural ones in the study
- Quantifying the 'impact' of each of the procurement systems is rather ambiguous due to the lack of concrete indicators to record aspects like corruption, governance and so on. Thus, this section is qualitatively recorded with the help of a few indicators composed based on existing literature and some aspects specific to public procurement systems

## Introduction

Over the years India has seen a tremendous growth in the pharmaceutical sector yet it is grappling with a large population that is denied basic access to healthcare and essential medicines. According to a WHO report on World's medicines situation (WHO, 2004) almost 68% of the people in India have limited or no access to essential medicines. Inadequate medicine access poses a major barrier to the objective of delivering essential healthcare and the more recently talked about universal healthcare. According to United Nations Development Group (UNDG, 2003), medicine access is defined as "having medicines continuously available and affordable at public or private health facilities or medicine outlets that are within one hour walk from the homes of the people". Fulfilment of all these factors is arguably low in developing countries like in India. Exhibit 1 shows the decreasing trend in the supply of free medicines since 1986 and also a corresponding increase in the number of people not receiving any medicines at all for out-patient care.

Exhibit 1: Access to medicines in India

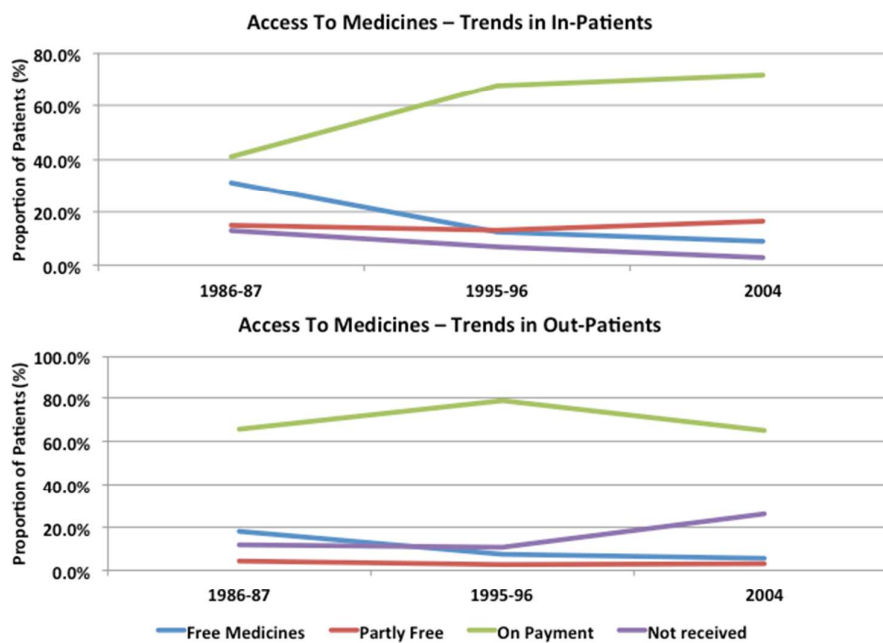

Source: Health data extracted from National Sample Survey Rounds 60, 52, and 42

Private health expenditure constitutes almost 70% of the total health expenditure of which drugs form a massive component anywhere between 20-65% in India and other transitional economies compared to 18% in OPEC countries (Cameron, Ewen, Ross-Degnan, Ball, & Laing, 2009). The burden of purchasing medicines is very high in India accounting for the second largest bulk of expenditure after food. The high cost of medicine purchase in India and relatively low public health investment is exacerbating the lack of essential medicines access in India. It is now well known, accepted and documented that out-of-pocket (OOP) payment for health care has pushed many people into poverty. Bearing the costs of a single hospitalization, 35% of people fall below the poverty line and out-of-pocket medical costs alone may push 2.2% of the population below the poverty line in one year. (*India – Raising the Sights: Better Health Systems for India's Poor*, World Bank, 2001). Exhibit 2 below gives a glimpse of the health care spending in India for 2004-05 across various states.

Exhibit 2: Healthcare Spending in India 2004-05 (Figures in INR)

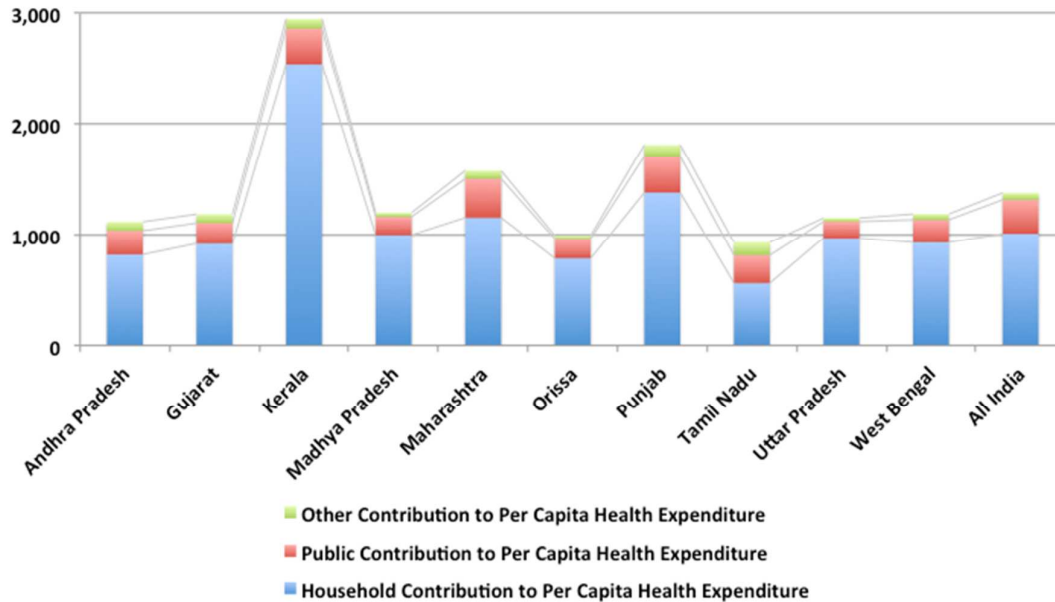

Source: Report of National Commission on Macroeconomics and Health, GOI 2005

Strengthening the public sector availability of quality drugs will relieve a large number of people to whom medical expenditure may be catastrophic. This paper, focussing on the public drug procurement models in India, will detail five main factors of the systems – low financial burden, good quality, timely availability, minimal wastage and transparency – that are important to improve access to medicines. Although rational usage of drugs and medical awareness amongst the people is equally important to determine the success of the public procurement systems, this paper only deals with the supply side of the medicines access issue. Accordingly, the objective of the paper is to understand and compare the public drug procurement systems in five Indian states – Kerala, Maharashtra, Odisha, Punjab and Tamil Nadu – on the basis of a set of pre-determined comparison factors. And also explore whether the success of the procurement models depends on some crucial intangible elements beyond the procurement process or price.

## Methodology

The study was designed to compare public drug procurement models of a sample of states on a set of 53 pre-determined parameters. These parameters reflect each of the five main objectives of comparison viz. low financial burden, good quality, timely availability, transparency and wastage elimination through efficient supply chain.

The sample states were chosen to ensure heterogeneity in a number of factors: a) Procurement Type (centralized, decentralized or mixed); b) Autonomy of the procurement organization; c) State of public health infrastructure and d) Public health care budgets. Based on these parameters, the sample of states initially chosen were Kerala, Tamil Nadu, Maharashtra, Punjab, Uttar Pradesh and West Bengal. Consequently, Right to Information (RTI)<sup>1</sup> applications were sent to the concerned Public Information Officers (PIOs) to seek drug procurement and process data. However, due to lack of data responses despite multiple appeals from Uttar Pradesh and West Bengal, these states were replaced with Orissa (See Exhibit 3)

<sup>1</sup> Right to information act: **Right to Information Act 2005** mandates timely response to citizen requests for government information

Exhibit 3: Sample states for the study

| Sampling Attribute           | Kerala           | Tamil Nadu       | Maharashtra             | Orissa           | Punjab                  |
|------------------------------|------------------|------------------|-------------------------|------------------|-------------------------|
| <b>Procurement Type</b>      | Centralized      | Mixed            | Primarily Decentralized | Mixed            | Primarily Decentralized |
| <b>Autonomy</b>              | Fully Autonomous | Fully Autonomous | Government owned        | Government owned | Government owned        |
| <b>Health Infrastructure</b> | Good             | Good             | Poor                    | Poor             | Good                    |
| <b>Geography</b>             | South            | South            | Mid-West                | Mid-East         | North                   |

Procurement type mentioned in the above table is used to refer to the model where in the state drug procurement budget is divided between centralized and decentralized methods of acquiring medicines. Autonomy refers to the extent of government involvement in the decisions of the procurement organization; “fully autonomous” implies minimal involvement while “government owned” indicates a high degree of involvement. The rating of health infrastructure as ‘good’ and ‘poor’ has been based upon the perceived condition of the infrastructure such as the drug warehouses, transportation facilities, CHC/ PHC and district hospital conditions.

Brief information about the sample states, for an overview of the context, is presented in Exhibit 4.

Exhibit 4: Overview of Sample States

| Parameter                                                | Kerala     | Maharashtra | Orissa     | Punjab     | Tamil Nadu |
|----------------------------------------------------------|------------|-------------|------------|------------|------------|
| <b>Total Population</b>                                  | 33,387,677 | 112,372,972 | 41,947,358 | 27,704,236 | 72,138,958 |
| <b>Urban/Rural Population Ratio</b>                      | 91.3%      | 82.6%       | 20.0%      | 60.0%      | 94.0%      |
| <b>Annual Per capita Income</b>                          | 59,179     | 83,471      | 36,923     | 67,473     | 72,993     |
| <b>Annual Per capita Exp. - Rural</b>                    | 22,020     | 13,836      | 9,816      | 19,788     | 13,920     |
| <b>Annual Per capita Exp. - Urban</b>                    | 28,956     | 29,244      | 18,576     | 25,308     | 23,376     |
| <b>Total Per Capita Health Exp.</b>                      | 2,952      | 1,576       | 995        | 1,813      | 933        |
| Public Component %                                       | 10.8%      | 22.1%       | 18.0%      | 18.0%      | 26.6%      |
| Private Component %                                      | 86.3%      | 73.3%       | 79.1%      | 76.1%      | 60.7%      |
| <b>Number of Sub-Centers</b>                             | 4,575      | 10,579      | 6,688      | 2,950      | 8,706      |
| <b>Number of PHCs</b>                                    | 697        | 1816        | 1279       | 394        | 1277       |
| <b>Number of CHCs</b>                                    | 226        | 376         | 231        | 129        | 256        |
| <b>Number of DHs</b>                                     | 14         | 35          | 32         | 20         | 29         |
| <b>Birth Rate (/1000 Population)</b>                     | 14.7       | 17.9        | 21.5       | 17.6       | 15.8       |
| <b>Death Rate (/1000 Population)</b>                     | 6.8        | 6.6         | 9.2        | 7          | 7.2        |
| <b>Infant Mortality Rate (/1000 Live Births)</b>         | 13         | 33          | 71         | 43         | 35         |
| <b>Maternal Mortality Rate (Per 100,000 Live Births)</b> | 110        | 130         | 303        | 192        | 111        |
| <b>Total Fertility Rate (Children Per Woman)</b>         | 1.7        | 2           | 2.4        | 2          | 1.6        |

Source: Census 2011; Level and Pattern of Consumer Expenditure 2009-10 NSSO 66<sup>th</sup> round; Bulletin on Rural Health Statistics in India 2008, MoHFW; Sample Registration Survey 2010-11

Primary data for the study was gathered through warehouse audits and semi-structured interviews with executive leadership teams of the drug procurement cells and public health officials in the sample states in March – April 2012. The secondary resources used are the statistical databases, peer reviewed articles and grey literature.

## Findings & Discussion

The procurement processes followed in the sample states were evaluated against a pre-determined set of 53 parameters (including price). See Exhibit 5 for the list of pre-determined parameters used for comparison.

*Exhibit 5: Overview of Comparison Parameters*

|                                                |                                                                                                                                                                                                                                                                                       |
|------------------------------------------------|---------------------------------------------------------------------------------------------------------------------------------------------------------------------------------------------------------------------------------------------------------------------------------------|
| <b>Overall</b>                                 | <ul style="list-style-type: none"> <li>• Legal Status of the Procurement Organization; Drug Procurement Budget; Per Capita Drug Procurement Budget;</li> </ul>                                                                                                                        |
| <b>Essential Drug List</b>                     | <ul style="list-style-type: none"> <li>• EDL Customization; EDL Committee Composition; Frequency of EDL Revision; Time for EDL Preparation/ Revision; EDL Categorization; Third Party Review of EDL</li> </ul>                                                                        |
| <b>Demand Estimation &amp; Forecast</b>        | <ul style="list-style-type: none"> <li>• Demand Estimation Process; Frequency of Demand Estimation; Methodology for Estimation (Facility Level)</li> </ul>                                                                                                                            |
| <b>Procurement Process</b>                     | <ul style="list-style-type: none"> <li>• Procurement mechanism in the state; Financing of Drug Procurement; Emergency Drug Budget Allocation; Bidding Process</li> </ul>                                                                                                              |
| <b>Prequalification Criteria</b>               | <ul style="list-style-type: none"> <li>• Min. Turnover Criteria; GMP/WHO-GMP/US-FDA; ISI/BIS/ISO/CE; Assurance of avbl. Production Capacity; Market Standing; Exclusion Criteria; Price Relaxation; Product Reservation; EMD (%); Tenders with no bidders; Supply Schedule</li> </ul> |
| <b>Quality Control</b>                         | <ul style="list-style-type: none"> <li>• External Quality Testing Of Every Consignment; Testing Before Distribution; Testing Before Distribution</li> </ul>                                                                                                                           |
| <b>Payment Mechanism</b>                       | <ul style="list-style-type: none"> <li>• Payment Department Status; Lead Time For Payment; Prerequisites For Payment Disbursement</li> </ul>                                                                                                                                          |
| <b>Inventory Management &amp; Distribution</b> | <ul style="list-style-type: none"> <li>• Facilities Per Warehouse; Scientific Warehousing Practices; Supply Chain Management; Inventory Management; Scientific Forecasting; Flexibility to Alter Indent; Tracking dispatched drugs; Scientific inventory Mgmt. at Facility</li> </ul> |
| <b>Penalties</b>                               | <ul style="list-style-type: none"> <li>• Supply Default; Quality Failure; Blacklisting Criteria</li> </ul>                                                                                                                                                                            |
| <b>IT Systems Enablement (of)</b>              | <ul style="list-style-type: none"> <li>• Demand Estimation &amp; Forecasting; Tendering Process; Quality Control; Payment Disbursement; Inventory Management (Warehouse); Inventory Management (Facility)</li> </ul>                                                                  |

The detailed comparison tablets are presented in annexures (See annexure 1 for procurement process comparison and annexure 2 for price comparison of 32 selected molecules that appear in same dosages commonly across the sample states). In many instances, the process followed is very different from the one given in the manuals. The information captured below relates to the process that are actually followed.

An efficient drug distribution system ensures the **right medicines** in **sufficient quantities** procured at **lowest prices** to secure the **maximum therapeutic value** to the **largest number of beneficiaries** with the **available & additional resources**.

Broadly speaking, the two main beneficiaries in this context are the government and the patient. On one hand, rationality dictates that any government in a resource-constrained setting would expect that an effective procurement system would ensure availability of quality medicines while optimizing the finances to ensure best outcomes. It is also in the interest of the government to run this system transparently to promote competition and thus efficiency. On the other hand, a patient expects that good quality medicines are available at all time, free of cost. (See Exhibit 6 for an expectation map of both beneficiaries). Leadership, technical capability and information technology overarching the expectations in the exhibit below are the pre-requisites for running a system efficiently. The capability of each states' procurement system to enhance IT usage and administrative capabilities driven by a strong leader is pre-requisite.

*Exhibit 6: Combined Expectation Mapping of Beneficiaries of a Public Procurement System*



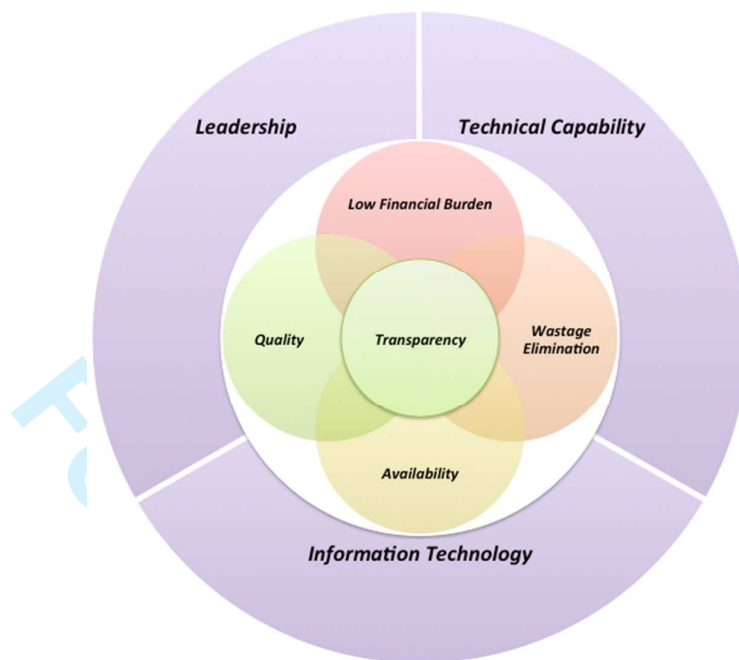

### Low Financial Burden

Low financial burden to the government ex-chequer is an important aspect of the public drug procurement systems because of limited resources. Some of the parameters amongst the 53 comparatives that reflect a procurement system's capacity to reduce financial burden are the extent of capital expenditure for establishing the systems, costs for procurement, storage and transportation, the preciseness of the Essential Drug List (EDL) to suit the state health burden and finally the prices at which drugs are procured.

The procurement process adopted bears some strong repercussions on the budgets, which include both the capital expenditures and operating expenditure to run the system. For completely/predominantly centralized pooled procurement models like Tamil Nadu, Kerala and Odisha it is imperative to have an optimum number of warehouses to cater to all the public health facilities. Additionally, the system requires adequate transportation facilities to transfer supplies from warehouses to user institutions and IT enablement to manage the entire system necessitating a considerable initial capital expenditure. With a budget of INR 39.8 Million USD and USD 36.3 Million in FY2010 for Tamil Nadu and Kerala respectively, the states have been able to make capital investments – this also includes the cash surplus generated through management fees the autonomous procurement agencies charge. Kerala has about 19 warehouses while Tamil Nadu about 25, most of which comply with scientific standards of inventory management. Odisha, with a budget of INR USD 8.1 Million for FY2011, is unable to make the necessary investments to fully realize the benefits of centralized pooled procurement.

Maharashtra follows the system of centralized rate contracting and decentralized purchasing where the suppliers directly deliver the medicines to the facilities. While transportation costs are not borne by the state, its cost is built into the drug price. This system also requires significantly large storage facilities at each user institution thereby increasing the overall cost. Punjab was not considered into this analysis because it follows a mixed system with drugs worth about USD 0.4 Million being purchased in a centralized manner while user charges collected by district hospitals accounting for USD 3 Million are utilized to directly purchase drugs from the open market.



1  
2  
3 A well-formulated and localized EDL is imperative to make optimal use of the limited financial  
4 resources. Tamil Nadu, Kerala and Odisha purchase about 260 drugs each year as a part of EDL while  
5 in Maharashtra centralized rate contracting (decentralized purchasing) is done for about 1,850 drugs.  
6 Though the decentralized purchasing model offers more flexibility for facilities, the administrative  
7 costs of finalizing rate contracts for 1,850 drugs and empanelling the suppliers is by no measure  
8 insignificant.  
9

10 Finally – drug price: the largest expenditure component. Theoretically, centralized procurement  
11 offers volume discounts thereby reducing the financial burden; however Annexure 2 comparing  
12 prices of 32 drugs across the five states reveals that Tamil Nadu may not necessarily have the lowest  
13 price despite greater quantities. Despite the bulk discounts, some drugs are cheaper in states with  
14 arguably inefficient centralized/ predominantly centralized models like Odisha and Punjab and states  
15 with decentralized models like Maharashtra. Due to larger population, public preference towards  
16 the government's health system and good health infrastructure, it is safe to assume that the  
17 quantities for procurement in Tamil Nadu would be significantly higher than Odisha, Kerala or  
18 Punjab. Then the question that remains unanswered is how are the other states able to procure at  
19 prices lower than Tamil Nadu? The reasons could be many. For instance, supplier location – more  
20 than half of the suppliers to Tamil Nadu are from within the state. The same statistic for Kerala is  
21 14%, Maharashtra 34% and for Odisha, a surprising zero percent! With insufficient data, we are  
22 unable to confidently conclude the financial burden of all the variants of the procurement models.  
23 But perhaps this is a good lead to think about what is causing unexpected discrepancies in prices?  
24  
25

### 26 **Wastage Elimination**

27 Eliminating wastage of drugs (through mishandling or expiry) is necessary (but not sufficient) to  
28 optimize expenditure and ensure availability. Eliminating wastage is predicated upon effective  
29 inventory management, which deals with requirement gathering, analyzing consumption patterns  
30 and forecasting demand. Trained pharmacists using weekly, quarterly and annual consumption data  
31 are supposed to do the demand estimation each year. However in reality, the previous year's data is  
32 inflated by 10 – 15% in most states. In Odisha, however, owing to the lack of trained personnel,  
33 clerks/ computer operators perform these tasks.  
34  
35

36 Kerala was able to mitigate this inaccuracy in estimation by introducing the option of issuing a  
37 second purchase order (PO). The initial PO given to the supplier is only for 75% of the tender  
38 quantity. The procurement authorities have the privilege of either not issuing the second PO or  
39 issuing the second PO for 25% or 50% of the tender quantity thereby building in a flexibility of 25%.  
40 All other states have a rather static inventory management.  
41  
42

43 Furthermore, Kerala and Tamil Nadu use software tools to monitor stock levels and manage  
44 inventory and distribution. The warehouses in Punjab, Odisha and Maharashtra manually manage  
45 the inventory by recording data into ledgers. These systems are not designed to store all types of  
46 drugs in a scientific manner. These practices not only lead to wastage of material but also precious  
47 warehouse space (in case of over-supply).  
48

### 49 **Availability**

50 In the centralized model of pooled procurement, the distribution is managed centrally and the onus  
51 of the procurement agency is to ensure availability at the user institutions. The public health centers  
52 in Punjab and Maharashtra are at the mercy of the suppliers, owing to their decentralized  
53 purchasing model, whose supply is often sporadic due to various reasons like delayed payments, lack  
54 of proper planning etc. This impacts availability at the time of need and could potentially lead to  
55 wastage.  
56  
57  
58  
59  
60

## Quality

A procurement organization has two levers to ensure that only quality drugs enter the system: a) Pre-qualification criteria to filter out unqualified suppliers b) External quality testing protocols. When these levers are used together, quality is ensured while still keeping the prices low. States that have stringent external quality testing protocols can afford to keep the minimum turnover criterion low. For instance, Tamil Nadu has empanelled laboratories to which every sample from each batch is sent for quality testing before distributing to user institutions and the minimum turnover criteria is set at USD 0.7 Million (INR 3 Crores). Kerala too has similar quality testing protocols but has a higher minimum turnover criteria (set at USD 2.1 Million/ INR 10 crores) to enforce faith into the public system. Odisha and Maharashtra do not have any quality testing protocols in place, apart from the supplier's internal quality certificate, and have therefore set the minimum turnover criterion at INR 10 crores, assuming that higher volumes are more likely to be generated by suppliers with high quality products.

Additionally, states that have external quality testing protocols also have policies that provide price relaxation to Small Scale Industries (SSIs) and Public Sector Undertakings (PSUs) to encourage local industry. Such preference treatment doesn't exist in Odisha or Punjab. Maharashtra reserves 20% of quantities to SSIs only if they match the L1 rates and thus do not get any price preferences.

An important aspect of the pre-qualification criteria is also the GMP (good manufacturing practices) certificate. This certificate ensures that the facility follows the stipulated guidelines according to the industrial benchmarks and thus can ascertain a certain level of quality. Maharashtra demands a WHO-GMP certificate which is deemed to be more strict and reviewed every two years.

## Transparency

A public procurement system is accountable to various stakeholders and it is important that transparency is maintained in all its activities. Certain conditions need to be established for a more open and efficient functioning. TNMSC and KMSCL are autonomous organisations that are headed by an appointed Director who maybe a civil services officer with a very good technical and administrative background. The idea of having an autonomous organisation in the public sector may enable it to function more transparently by avoiding the plausible procedural delays and also to be able to make decisions of contracting and outsourcing as best suited for the prosperity of the organisation. On the other hand, Odisha, Punjab and Maharashtra have procurement cells that are a part of the Directorate of Health Services (DHS) in the state. A clear difference in the efficiency of the processes can be seen between the autonomous organisations and the state run organisations – In terms of lead times for payments, quality control and in the usage of IT systems and so on. In an autonomous system, most of the staff are contractual based on their technical capabilities which may not be the case in state run procurement organizations.

A multistakeholdership in the organisation may be useful tool for bringing in more transparency and representation provided it is well coordinated. Right from the formation of the essential drugs list (EDL) to the award of the tenders, open and multi-stakeholder decision making may help keep the system become more transparent. All the states under the purview of the study have a multi-stakeholder decision making body.

It is deemed to be a good practice to have a separate payment processing team from the tender award team in order to keep transactions more transparent. All the states issue the payment based on the receipt of stock in the warehouse and a quality certificate (either internal or external). The processing of payments through the public channels like (Auditor General's Office or Directorate of Accounts & Treasury) usually takes much longer, as noted in Maharashtra, Odisha and Punjab compared to the autonomous payment departments of TNMSC and KMSCL.

## Conclusion

In conclusion, we opine that the critical success factors of each model need to be carefully analyzed to see if they are valid in the state contexts. It is important for policy makers to understand in detail the tangible and intangible aspects that go into running a successful model before trying to replicate it. Also, in some states the existing structures may be serving the purpose but there maybe a need to do and undo several aspects of the current method of procurement, to make it more efficient. Sometimes, scrapping existing structures for new procedures may be a herculean task, which needs to be well thought out before undertaking.

Despite an effort to draw inferences from various primary and secondary sources, the study has some limitations that are mentioned below:

- Time and resource constraints have limited our primary data to one or two districts in each State. However, efforts were made to include both urban and rural ones in the study
- Quantifying the 'impact' of each of the procurement systems is rather ambiguous due to the lack of concrete indicators to record aspects like corruption, governance and so on. Thus, this section is qualitatively recorded with the help of a few indicators composed based on existing literature and some aspects specific to public procurement systems

## Works Cited

Cameron, A., Ewen, M., Ross-Degnan, D., Ball, D., & Laing, R. (2009). Medicines prices, availability and affordability in 36 developing and middle-income countries: a secondary analysis. *Lancet* , 240-249.

CDSCO. (2009). *Report on Country-Wide Survey of Spurious Drugs*. New-Delhi: CDSCO, MoHFW.

Khan, A., & Ghilzai, N. (2007). Counterfeit and Substandard Quality of drugs: The need for an effective and stringent regulatory control in India and other developing countries. *Indian J Pharmacol* , 206-207.

Kotwani, A., Ewen, M., Dey, D., Iyer, S., Lakshmi, P., Patel, A., et al. (2007). Prices and availability of common medicines at six sites in India using standard methodology. *Indian Journal of Med Res* , 645-654.

Narayanan, D. (2010 йил 27-July). Tamil Nadu Medical Services Corporation: A Success Story. *Forbes India* .

Patel, V., Vaidya, R., Naik, D., & Borker, P. (2005). Irrational Drug Use in India: A Prescription Survey from Goa. *Journal of Postgraduate medicine* , 9-12.

Russell, S. (2004). The Economic Burden of Illness for Households in Developing Countries: A Review of Studies Focussing on Malaria, Tuberculosis and Human Immunodeficiency Virus / Acquired Immunodeficiency Syndrome. *American Journal of Tropical Medicine and Hygiene* , 147-155.

Selveraj, S., & Karan, A. (2009). Deepening Health Insecurity in India: Evidence from National Sample Surveys Since 1980's. *Economic and Political Weekly* , 55-60.

Selveraj, S., & Nabar, V. (2010). Access to medicines in India: Issues, Challenges and Response. In A. Mahal, B. Debroy, & L. Ihandri, *India Health Report 2010*. New Delhi.

TNMSC. (2010 йил 15-July). Retrieved 2012 йил 28-March from TNMSC News Bulletin: <http://www.tnmsc.com/tnmsc/publication/July2010.pdf>

1  
2  
3 UNDG. (2003). *Indicators for Monitoring the Millennium Development Goals*. New York: United  
4 Nations.

5  
6 USAID. (2006). *Procurement Strategies for Health Commodities*. Arlington: DELIVER.

7  
8 WHO. (2004). *The World Medicines Situation*. WHO. WHO.

9  
10 Yadav, P., Stapleton, O., & Wassenhove, L. N. (2011). *Always Cola, Rarely Essential Medicines:  
11 Comparing Medicine and Consumer Product Supply Chain in the Developing World*. INSEAD.  
12

## 13 14 15 16 **Authors' Contributions**

- 17 • Prabal Vikram Singh: Involved in the conceptualization and study design, and analysis of  
18 findings.
- 19 • Anand Tatambhotla: Involved in the conceptualization and study design, field data  
20 collection and analysis of findings.
- 21 • Rohini Kalvakuntla: Involved in the conceptualization and study design, field data collection  
22 and analysis of findings.
- 23 • Maulik Chokshi: Involved in the conceptualization and study design, and analysis of  
24 findings.
- 25
- 26
- 27

## 28 29 **Funding Statement**

- 30 - Funded by Center for Health Market Innovations .
- 31
- 32

## 33 34 **Data Sharing Statement**

- 35 - There is no additional data set available.
- 36

## 37 38 **Competing Interests**

- 39 - There are no competing interests.
- 40
- 41
- 42
- 43
- 44
- 45
- 46
- 47
- 48
- 49
- 50
- 51
- 52
- 53
- 54
- 55
- 56
- 57
- 58
- 59
- 60

## Annexure 1

| Parameter                                       | Kerala                                                        | Orissa                                                              | Tamil Nadu                           | Punjab                                                 | Maharashtra                                             |
|-------------------------------------------------|---------------------------------------------------------------|---------------------------------------------------------------------|--------------------------------------|--------------------------------------------------------|---------------------------------------------------------|
| <b>Legal Status Of Procurement Organization</b> | Autonomous (KMSCL)                                            | Government Owned (Part Of DHS)                                      | Autonomous (TNMSC)                   | Government Owned (PHSC)                                | Government Owned                                        |
| <b>Drug Procurement Budget (USD)</b>            | 36.3 Million (2011 - 12)                                      | 8.1 Million (2010 - 11)                                             | 39.8 Million (2010 - 11)             | 3.4 Million (0.4 mil. State Budget + 3 mil. User Fees) | 87.5 Million (2010-11)                                  |
| <b>Per Capita Drug Procurement Budget</b>       | 51                                                            | 8.8                                                                 | 22.5                                 | 5.8                                                    | 35.6                                                    |
| <b>Essential Drug List</b>                      |                                                               |                                                                     |                                      |                                                        |                                                         |
| Customized State EDL                            | Yes                                                           | Yes                                                                 | Yes                                  | Yes                                                    | No, But It Has A Drug List Comprising 1850 Drugs        |
| Composition Of EDL Committee                    | Multistakeholder Committee                                    | Multistakeholder Committee                                          | Multistakeholder Committee           | Multistakeholder Committee                             | Multistakeholder Committee                              |
| Frequency Of EDL Revision                       | 1 Year                                                        | 2 Years                                                             | 1 Year                               | 1 Year                                                 | N/A                                                     |
| Time For EDL Preparation/ Revision              | 2 - 3 Months                                                  | 7 - 8 Months                                                        | 2 - 3 Months                         | 4 Months                                               | N/A                                                     |
| EDL Categorization                              | Yes (8 Product-Based Categories)                              | Yes (2 Demography-Based Lists)                                      | Yes (Product-Based Categories)       | Yes                                                    | N/A                                                     |
| Third Party Review Of EDL                       | No                                                            | Yes (By WHO Experts)                                                | No                                   | No                                                     | N/A                                                     |
| <b>Demand Estimation &amp; Forecast</b>         |                                                               |                                                                     |                                      |                                                        |                                                         |
| Demand Estimation Process                       | Aggregation Of Facility Indents                               | Aggregation Of Facility Indents                                     | Aggregation Of Facility Indents      | Aggregation Of Facility Indents                        | Facility Level Indenting                                |
| Frequency Of Demand Estimation                  | 1 Year                                                        | 1 Year                                                              | 1 Year                               | 1 Year                                                 | 1 Year                                                  |
| Methodology For Estimation (Facility Level)     | 10 - 15% Over Previous Year's Indent; Performed By Pharmacist | No Scientific Method; Usually Performed By Computer Operator/ Clerk | 10% Of The Previous Year Consumption | N/A                                                    | 10% Of Previous Year Consumption                        |
| <b>Procurement Process</b>                      |                                                               |                                                                     |                                      |                                                        |                                                         |
| Procurement Mechanism In The State              | Centralized                                                   | 80% Centralized; 20% Decentralized                                  | 90% Centralized; 10% Decentralized   | 12.5% Centralized; 87.5% Decentralized                 | Centralized Rate Contracting ; Decentralized Purchasing |
| Financing Of Drug Procurement                   | State Budget Allocation                                       | State Budget Allocation                                             | State Budget Allocation              | State Budget Allocation & User Charges                 | State Budget Allocation                                 |
| Emergency Drug Budget Allocation                | Yes (Additional Funds Released)                               | No (Purchased From Existing Budget)                                 | Yes (Additional Funds Released)      | No                                                     | Yes (Additional Funds Released)                         |
| <b>Tendering Process</b>                        |                                                               |                                                                     |                                      |                                                        |                                                         |

| Bidding Process                                            | Two Bid System                                                                        | Two Bid System                                                        | Two Bid System                                                       | Two Bid System                                   | Two Bid System                                                        |
|------------------------------------------------------------|---------------------------------------------------------------------------------------|-----------------------------------------------------------------------|----------------------------------------------------------------------|--------------------------------------------------|-----------------------------------------------------------------------|
| <b>Prequalification Criteria</b>                           |                                                                                       |                                                                       |                                                                      |                                                  |                                                                       |
| Min. Turnover Criteria (INR/USD)                           | 10 Crore/ 2.1 Million                                                                 | 10 Crore/ 2.1 Million                                                 | 3 Crore/ 0.7 Million                                                 | 50 Crore/ 10.7 Million                           | 10 Crores/ 2.1 Million                                                |
| GMP/ WHO-GMP/ US-FDA                                       | Required                                                                              | Required                                                              | Required                                                             | Required                                         | WHO-GMP Required                                                      |
| ISI/ BIS/ ISO/ CE                                          | Required                                                                              | Required                                                              | N/A                                                                  | N/A                                              | N/A                                                                   |
| Assurance Of Available Production Capacity                 | Required (MPMASS)                                                                     | None                                                                  | Production Capacity Certificate                                      | N/A                                              | Production Capacity Certificate                                       |
| Market Standing                                            | 2 Years                                                                               | 3 Years                                                               | 3 Years                                                              | 3 Years                                          | 3 Years                                                               |
| Exclusion Criteria For Factory Inspections                 | Supply To Premier Institutions                                                        | None                                                                  | None                                                                 | None                                             | N/A                                                                   |
| Price Relaxation For SSIs/ PSUs                            | Yes (SSI - 10%; PSU - 15%)                                                            | Yes (SSI - 10%; Additional 3% For ISO Certification)                  | Yes (SSI - 15%)                                                      | PSU produced Antibiotics                         | None (20% Quantity Reserved If SSI Matches L1 Rate)                   |
| Product Reservation For SSIs/ PSUs                         | None                                                                                  | 31 Items (From SSIs)                                                  | None                                                                 | None                                             | None                                                                  |
| EMD                                                        | 1% Of Tender Value                                                                    | 1 - 5% Of Tender Value                                                | 1% of Tender value (maximum upto 50,000 INR), expempted for SSI      | Differs For Each Drug                            | INR 25,000                                                            |
| Process For Tenders With No Bidders (In Order Of Priority) | Re-Tender (Revised Pre-Qualifications); Limited Tender; Short Tender; Direct Purchase | Re-Tender (Same Pre-Qualifications) - Open Until Bids Are Received    | Re-tender (Limited and Short tender process is used)                 | Pharmacy Based Purchasing                        | Re-Tendering, Limited Tendering Or Direct Purchase                    |
| Supply Schedule                                            | 60 Days - 40% Of PO Quantity; 90 Days - 70%; 120 Days - 100%                          | 60 Days - 50% Of PO Quantity; Rest Before Specified Date              | Starting from 30 days and has to end by 60 days, otherwise specified | 30 days to 3 months from the time of issue of PO | Within 3 Months From The Issue Of PO                                  |
| <b>Quality Control</b>                                     |                                                                                       |                                                                       |                                                                      |                                                  |                                                                       |
| External Quality Testing Of Every Consignment              | Empanelled Private Labs                                                               | No External Quality Testing (Supplier's Internal Quality Certificate) | Empanelled Private and government labs                               | Empanelled Government Labs                       | No External Quality Testing (Supplier's Internal Quality Certificate) |
| Testing Before Distribution                                | Mandatory                                                                             | Not Mandatory                                                         | Mandatory                                                            | Mandatory                                        | Not Mandatory                                                         |
| Lead Time For Quality Testing                              | ~ 15 Days                                                                             | Within 8 Weeks                                                        | 15 Days For Tablets And Capsules; 1 Month For Suspensions            | 1 Month                                          | N/A                                                                   |
| <b>Payment Mechanism</b>                                   |                                                                                       |                                                                       |                                                                      |                                                  |                                                                       |
| Payment Department Status                                  | Autonomous (Managed By Contractual Staff)                                             | Government (Account General's Office)                                 | Autonomous (Managed By Contractual Staff)-IT                         | Government                                       | Government (Directorate Of Accounts And Treasuries)                   |

|                                                     |                                                                                                                  |                                                                       |                                                          |                                                            |                                                                                                                               |
|-----------------------------------------------------|------------------------------------------------------------------------------------------------------------------|-----------------------------------------------------------------------|----------------------------------------------------------|------------------------------------------------------------|-------------------------------------------------------------------------------------------------------------------------------|
|                                                     | enabled                                                                                                          |                                                                       |                                                          |                                                            |                                                                                                                               |
| Lead Time For Payment                               | ~ 30 Days                                                                                                        | ~90 Days                                                              | 30 Days                                                  | Min. 30 Days                                               | ~ 90 Days                                                                                                                     |
| Prerequisites For Payment Disbursement              | Warehouse Material Receipt, External Quality Certificate                                                         | Warehouse Material Receipt, Supplier's Internal Quality Certificate   | Warehouse Material Receipt, External Quality Certificate | Warehouse Material Receipt, Quality Certificates From Labs | Facility Material Receipt, Internal Quality Certificate                                                                       |
| <b>Inventory Mgmt. &amp; Distribution</b>           |                                                                                                                  |                                                                       |                                                          |                                                            |                                                                                                                               |
| Facilities (All) Catered To Per Warehouse (Average) | ~290                                                                                                             | ~235                                                                  | ~411                                                     | N/A                                                        | N/A                                                                                                                           |
| Scientific Warehousing Practices                    | Yes                                                                                                              | No                                                                    | Yes                                                      | No                                                         | No                                                                                                                            |
| In-House/ Outsourced Supply Chain Management        | Outsourced                                                                                                       | In-House                                                              | In-House                                                 | In-House                                                   | In-House (Facility Level)                                                                                                     |
| Inventory Management                                | Dynamic (Flexibility Of 2nd PO)                                                                                  | Static (Only Single PO Is Issued)                                     | Dynamic (Flexibility Of 2nd PO)                          | Static                                                     | 25% Flexibility For Quantity Maintained                                                                                       |
| Scientific Consumption/ Inventory Forecasting       | Yes (Inventory Management Software)                                                                              | No                                                                    | Yes (Inventory Management Software)                      | No                                                         | No                                                                                                                            |
| Flexibility For Facilities To Alter Indent          | Yes (Just Before Dispatch)                                                                                       | No                                                                    | Yes                                                      | Yes                                                        | No                                                                                                                            |
| Tracking Dispatched/ Delivered Drugs                | Currently Passbook (Volume Based; Online In Future)                                                              | No Tracking                                                           | Passbook (Value Based)                                   | N/A                                                        | No                                                                                                                            |
| (Scientific) Inventory Management At Facility       | No (Online In Future)                                                                                            | No                                                                    | Use First in First Out (FIFO) principle                  | No                                                         | No                                                                                                                            |
| <b>Penalty</b>                                      |                                                                                                                  |                                                                       |                                                          |                                                            |                                                                                                                               |
| Penalty For Supply Schedule Default                 | 10% Of The Unexecuted Supply; Unexecuted Supply Purchased At The Cost Of Supplier In Case Of Inability To Supply | N/A                                                                   | 0.5% per day to maximum of 15% of the tender amount      | N/A                                                        | 0.5% Of The Value Of Unsupplied Goods Per Week Up To 5 Weeks, After Which Unexecuted Supply Purchased At The Cost Of Supplier |
| Penalty For Quality Failure                         | Supplier Blacklisted With Forfeiture Of Security Deposit                                                         | Suppliers Have To Replace The Entire PO Quantity Or Risk Blacklisting | Supplier Blacklisted With Forfeiture Of Security Deposit | Forfeiture Of EMD                                          | Supplier Blacklisted With Forfeiture Of Security Deposit                                                                      |



| Blacklisting Criteria            | Defaulting On 3 POs Or More With Less Than 50% Supply; Blacklisted By Any Other Procurement Agency On Quality Grounds | Quality Failure After Material Supply | Defaulting Continuously on 3 POs With Less Than 50% Supply, Quality Failure, Blacklisted By National Or Other State Level Agencies | Defaulting Continuously on 3 POs With Less Than 50% Supply, Quality Failure, Blacklisted By National Or Other State Level Agencies | Supply Default After Extension Period; Quality Failure |
|----------------------------------|-----------------------------------------------------------------------------------------------------------------------|---------------------------------------|------------------------------------------------------------------------------------------------------------------------------------|------------------------------------------------------------------------------------------------------------------------------------|--------------------------------------------------------|
| <b>IT Enablement Processes:</b>  |                                                                                                                       |                                       |                                                                                                                                    |                                                                                                                                    |                                                        |
| Demand Estimation & Forecasting  | Yes                                                                                                                   | No                                    | Yes                                                                                                                                | No                                                                                                                                 | No                                                     |
| Tendering Process                | Yes                                                                                                                   | No                                    | Yes                                                                                                                                | No                                                                                                                                 | Yes                                                    |
| Quality Control                  |                                                                                                                       | No                                    | Yes                                                                                                                                | No                                                                                                                                 | No                                                     |
| Payment Disbursement             | Yes                                                                                                                   | No                                    | Yes                                                                                                                                | No                                                                                                                                 | No                                                     |
| Inventory Management (Warehouse) | Yes                                                                                                                   | Yes                                   | Yes                                                                                                                                | No                                                                                                                                 | No                                                     |
| Inventory Management (Facility)  | No                                                                                                                    | No                                    | Yes                                                                                                                                | No                                                                                                                                 | No                                                     |

## Annexure 2

| Name of Drug      | Dosage                    | Unit    | Price (INR) |                 |             |                  |             |
|-------------------|---------------------------|---------|-------------|-----------------|-------------|------------------|-------------|
|                   |                           |         | Kerala 2012 | Tamil Nadu 2012 | Odisha 2009 | Maharashtra 2011 | Punjab 2010 |
| Adrenaline        | 1mg/1 ml                  | Ampoule | 2.89        | 1.21            | 1.46        | 1.80             | n/a         |
| Albendazole       | 400 mg                    | Tablet  | 0.81        | 0.57            | 0.49        | 0.61             | 0.64        |
| Aminophylline     | 25 mg/ml                  | Ampoule | n/a         | 2.60            | 2.91        | 4.90             | n/a         |
| Amitriptyline     | 25 mg                     | Tablet  | 0.22        | 0.15            | 0.15        | 0.19             | n/a         |
| Amlodipine        | 5 mg                      | Tablet  | 0.16        | 0.06            | 0.09        | 0.10             | 0.13        |
| Atenolol          | 50 mg                     | Tablet  | 0.125       | 0.11            | 0.13        | 0.14             | 0.14        |
| Benzyl Penicillin | 10 Lakh IU                | Vial    | 3.68        | 3.08            | 4.20        | 4.88             | n/a         |
| Carbamazepine     | 200 mg                    | Tablet  | 0.59        | 0.54            | 0.42        | 0.53             | n/a         |
| Cefotaxime        | 250 mg                    | Vial    | 4.73        | 3.94            | 5.40        | 5.14             | n/a         |
| Ciprofloxacin     | 500 mg                    | Tablet  | 1.09        | 1.04            | 0.87        | 1.07             | 1.86        |
| Co-trimoxazole    | 40mg+<br>200mg<br>per 5ml | Bottle  | n/a         | 5.91            | 5.90        | 6.74             | n/a         |

1  
2  
3  
4  
5  
6  
7  
8  
9  
10  
11  
12  
13  
14  
15  
16  
17  
18  
19  
20  
21  
22  
23  
24  
25  
26  
27  
28  
29  
30  
31  
32  
33  
34  
35  
36  
37  
38  
39  
40  
41  
42  
43  
44  
45  
46  
47  
48  
49  
50  
51  
52  
53  
54  
55  
56  
57  
58  
59  
60

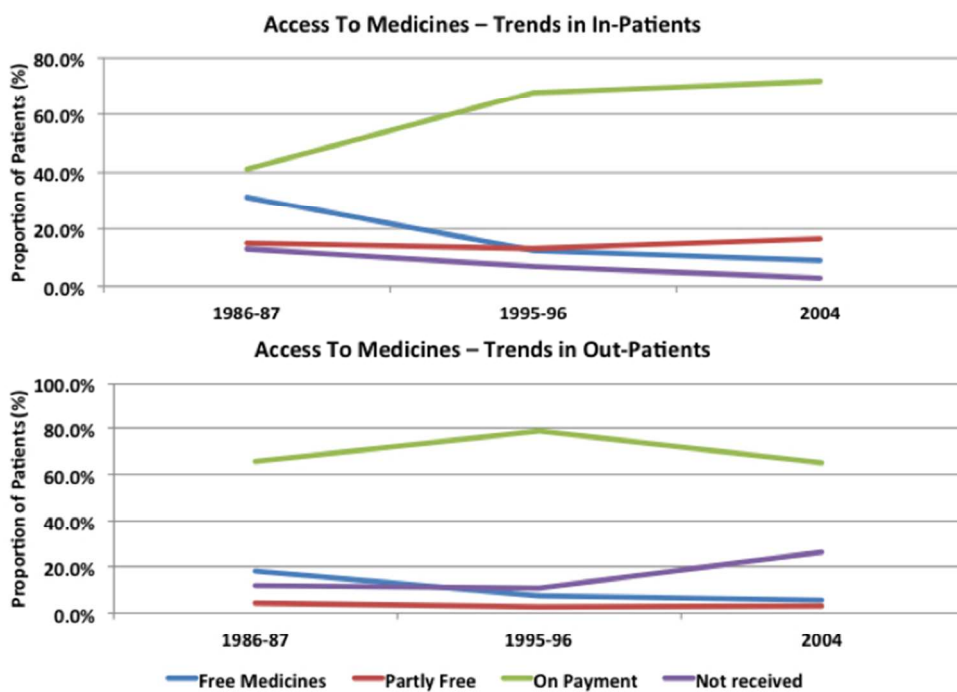

Source: Health data extracted from National Sample Survey Rounds 60, 52, and 42

Review only

1  
2  
3  
4  
5  
6  
7  
8  
9  
10  
11  
12  
13  
14  
15  
16  
17  
18  
19  
20  
21  
22  
23  
24  
25  
26  
27  
28  
29  
30  
31  
32  
33  
34  
35  
36  
37  
38  
39  
40  
41  
42  
43  
44  
45  
46  
47  
48  
49  
50  
51  
52  
53  
54  
55  
56  
57  
58  
59  
60

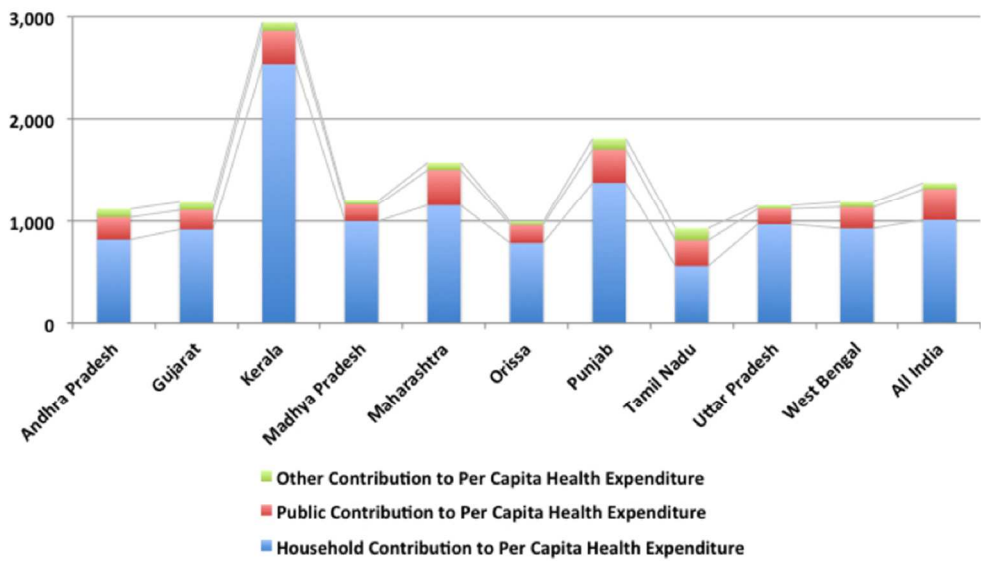

Source: Report of National Commission on Macroeconomics and Health, GOI 2005

|                                                |                                                                                                                                                                                                                                                                                              |
|------------------------------------------------|----------------------------------------------------------------------------------------------------------------------------------------------------------------------------------------------------------------------------------------------------------------------------------------------|
| <b>Overall</b>                                 | <ul style="list-style-type: none"> <li>• <i>Legal Status of the Procurement Organization; Drug Procurement Budget; Per Capita Drug Procurement Budget;</i></li> </ul>                                                                                                                        |
| <b>Essential Drug List</b>                     | <ul style="list-style-type: none"> <li>• <i>EDL Customization; EDL Committee Composition; Frequency of EDL Revision; Time for EDL Preparation/ Revision; EDL Categorization; Third Party Review of EDL</i></li> </ul>                                                                        |
| <b>Demand Estimation &amp; Forecast</b>        | <ul style="list-style-type: none"> <li>• <i>Demand Estimation Process; Frequency of Demand Estimation; Methodology for Estimation (Facility Level)</i></li> </ul>                                                                                                                            |
| <b>Procurement Process</b>                     | <ul style="list-style-type: none"> <li>• <i>Procurement mechanism in the state; Financing of Drug Procurement; Emergency Drug Budget Allocation; Bidding Process</i></li> </ul>                                                                                                              |
| <b>Prequalification Criteria</b>               | <ul style="list-style-type: none"> <li>• <i>Min. Turnover Criteria; GMP/WHO-GMP/US-FDA; ISI/BIS/ISO/CE; Assurance of avbl. Production Capacity; Market Standing; Exclusion Criteria; Price Relaxation; Product Reservation; EMD (%); Tenders with no bidders; Supply Schedule</i></li> </ul> |
| <b>Quality Control</b>                         | <ul style="list-style-type: none"> <li>• <i>External Quality Testing Of Every Consignment; Testing Before Distribution; Testing Before Distribution</i></li> </ul>                                                                                                                           |
| <b>Payment Mechanism</b>                       | <ul style="list-style-type: none"> <li>• <i>Payment Department Status; Lead Time For Payment; Prerequisites For Payment Disbursement</i></li> </ul>                                                                                                                                          |
| <b>Inventory Management &amp; Distribution</b> | <ul style="list-style-type: none"> <li>• <i>Facilities Per Warehouse; Scientific Warehousing Practices; Supply Chain Management; Inventory Management; Scientific Forecasting; Flexibility to Alter Indent; Tracking dispatched drugs; Scientific inventory Mgmt. at Facility</i></li> </ul> |
| <b>Penalties</b>                               | <ul style="list-style-type: none"> <li>• <i>Supply Default; Quality Failure; Blacklisting Criteria</i></li> </ul>                                                                                                                                                                            |
| <b>IT Systems Enablement (of)</b>              | <ul style="list-style-type: none"> <li>• <i>Demand Estimation &amp; Forecasting; Tendering Process; Quality Control; Payment Disbursement; Inventory Management (Warehouse); Inventory Management (Facility)</i></li> </ul>                                                                  |

review only

1  
2  
3  
4  
5  
6  
7  
8  
9  
10  
11  
12  
13  
14  
15  
16  
17  
18  
19  
20  
21  
22  
23  
24  
25  
26  
27  
28  
29  
30  
31  
32  
33  
34  
35  
36  
37  
38  
39  
40  
41  
42  
43  
44  
45  
46  
47  
48  
49  
50  
51  
52  
53  
54  
55  
56  
57  
58  
59  
60

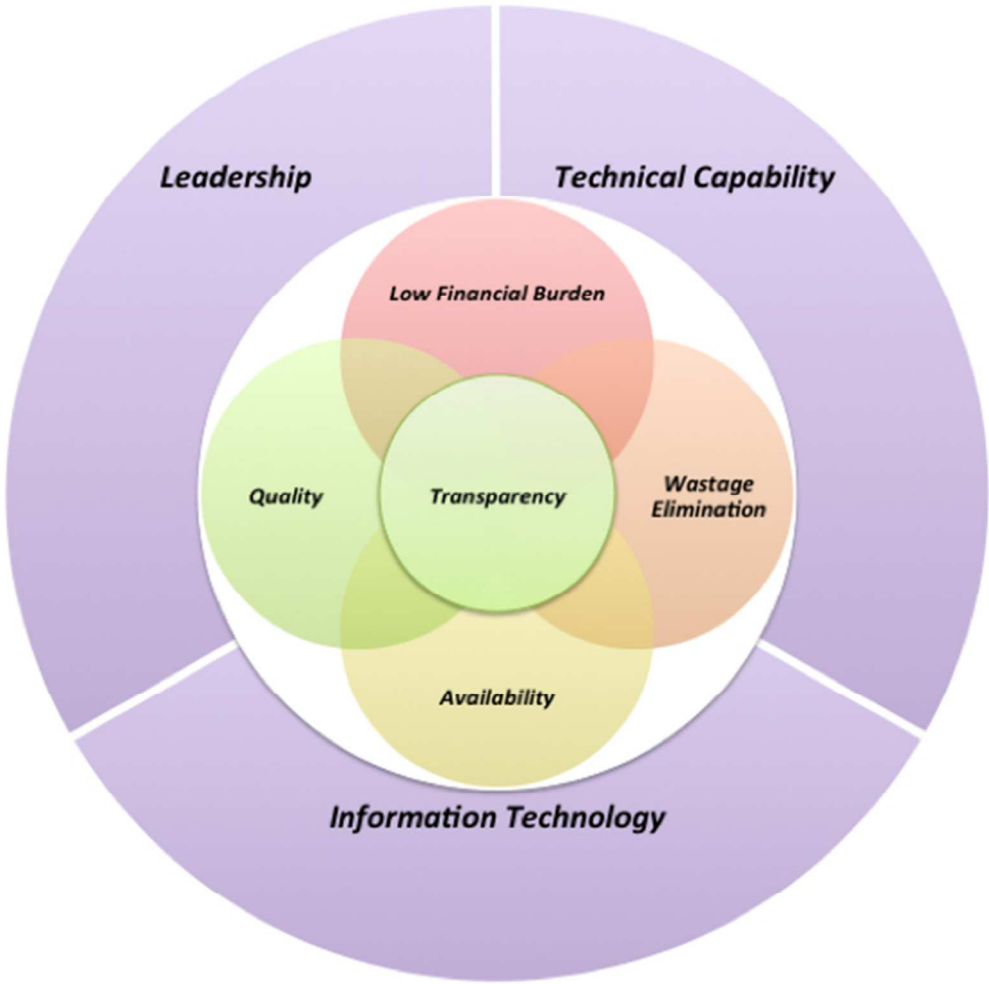

only

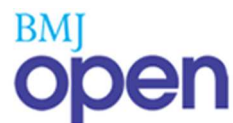

**Understanding public drug procurement in India – A comparative study of five Indian states**

|                                 |                                                                                                                                                                                                          |
|---------------------------------|----------------------------------------------------------------------------------------------------------------------------------------------------------------------------------------------------------|
| Journal:                        | <i>BMJ Open</i>                                                                                                                                                                                          |
| Manuscript ID:                  | bmjopen-2012-001987.R1                                                                                                                                                                                   |
| Article Type:                   | Research                                                                                                                                                                                                 |
| Date Submitted by the Author:   | 21-Nov-2012                                                                                                                                                                                              |
| Complete List of Authors:       | Singh, Prabal; ACCESS Health International, Tatambhotla, Anand; ACCESS Health International, Kalvakuntla, Rohini; ACCESS Health International, Chokshi, Maulik; Indian Institute of Public Health Delhi, |
| <b>Primary Subject Heading</b>: | Health policy                                                                                                                                                                                            |
| Secondary Subject Heading:      | Health policy                                                                                                                                                                                            |
| Keywords:                       | Health policy < HEALTH SERVICES ADMINISTRATION & MANAGEMENT, Organisation of health services < HEALTH SERVICES ADMINISTRATION & MANAGEMENT, PUBLIC HEALTH                                                |
|                                 |                                                                                                                                                                                                          |

SCHOLARONE™  
Manuscripts

## Title

Understanding public drug procurement in India – A comparative study of five Indian states

## Abstract

India is in the midst of metamorphosis of its health policies to achieve universal healthcare and access to essential medicines is one of its critical mandates. Much discussion has risen on the need to strengthen the public drug procurement systems at the state levels in order to ensure good quality and timely supply of essential drugs at all public health facilities. Different states in India follow different public procurement systems ranging from centralized pooled procurement to decentralized procurement. This study aims perform an initial comparison, predominantly qualitative, between the different procurement models to frame questions for future research in this area. The finer differences between the state models, even though seemingly similar from the outside impact access to medicines for people hugely and this has been captured in the study. The five states included in the study – Tamil Nadu, Kerala, Odisha, Punjab and Maharashtra were chosen to ensure heterogeneity in a number of factors such as procurement type (centralized, decentralized or mixed); autonomy of the procurement organization; state of public health infrastructure; and geography. Data on procurement processes was collected through key informant analysis by way of semi-structured interviews with leadership teams of procuring organizations. This process data was validated through interviews with field staff (stakeholders of district hospitals, taluk hospitals, community health centers, and primary health centers) in each state. Data on procurement price was assimilated by way of RTI responses from state public information officers. The procurement processes in each state were compared across 52 pre-determined parameters. The analysis indicated that autonomous procurement organizations were more efficient in relation to payments to suppliers, had relatively lower drug procurement prices and managed their inventory more scientifically. Furthermore, the authors highlight critical success factors that significantly influence the outcome of any procurement model. In a way, this study raises more questions and seeks the need for further research in this arena.



## Introduction

Over the years India has seen a tremendous growth in the pharmaceutical sector yet it is grappling with a large population that is denied basic access to healthcare and essential medicines. According to a WHO report on World's medicines situation (WHO, 2004) almost 68% of the people in India have limited or no access to essential medicines. Inadequate medicine access poses a major barrier to the objective of delivering essential healthcare and the more recently talked about universal healthcare. According to United Nations Development Group (UNDG, 2003), medicine access is defined as "having medicines continuously available and affordable at public or private health facilities or medicine outlets that are within one hour walk from the homes of the people". Fulfilment of all these factors is arguably low in developing countries like in India. Exhibit 1 shows the decreasing trend in the supply of free medicines since 1986 and also a corresponding increase in the number of people not receiving any medicines at all for out-patient care.

Exhibit 1: Access to medicines in India

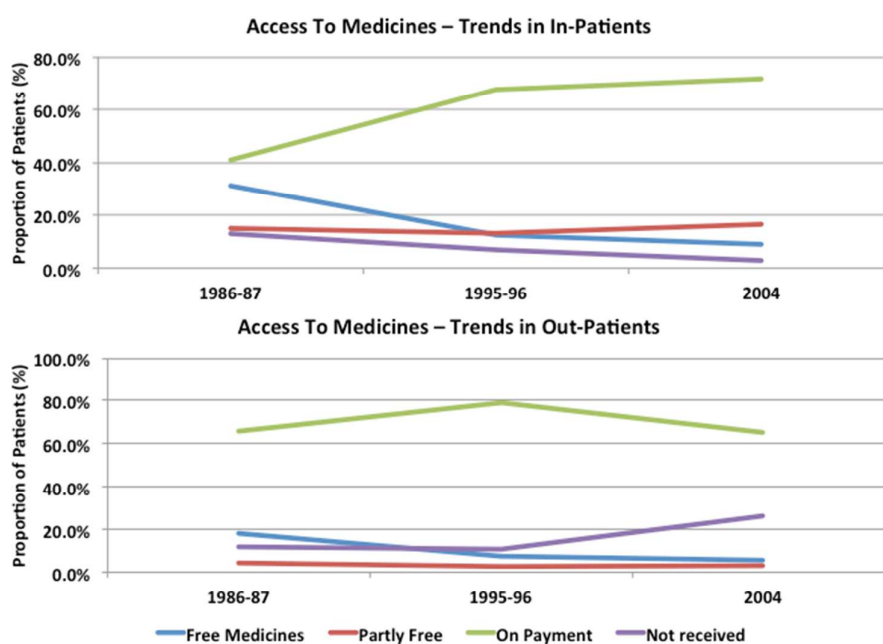

Source: Health data extracted from National Sample Survey Rounds 60, 52, and 42

Private health expenditure constitutes almost 70% of the total health expenditure of which drugs form a massive component anywhere between 20-65% in India and other transitional economies compared to 18% in OPEC countries (Cameron, Ewen, Ross-Degnan, Ball, & Laing, 2009). The burden of purchasing medicines is very high in India accounting for the second largest bulk of expenditure after food. The high cost of medicine purchase in India and relatively low public health investment is exacerbating the lack of essential medicines access in India. It is now well known, accepted and documented that out-of-pocket (OOP) payment for health care has pushed many people into poverty. Bearing the costs of a single hospitalization, 35% of people fall below the poverty line and out-of-pocket medical costs alone may push 2.2% of the population below the poverty line in one year. (*India – Raising the Sights: Better Health Systems for India's Poor*, World Bank, 2001). Exhibit 2 below gives a glimpse of the health care spending in India for 2004-05 across various states.

Exhibit 2: Healthcare Spending in India 2004-05 (Figures in INR)

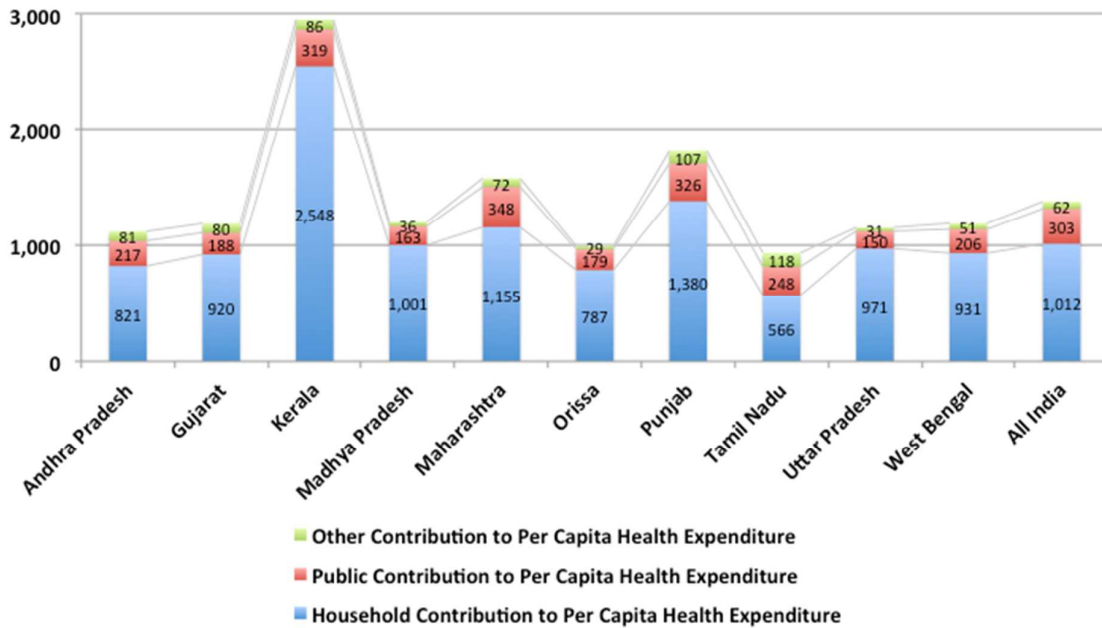

Source: Report of the National Commission on Macroeconomics and Health, Government of India, 2005

Strengthening the public sector availability of quality drugs is one of the long-term, sustainable ways to relieve a large number of people to whom medical expenditure may be catastrophic. This paper, focussing on the public drug procurement models in India, will detail five main factors of the systems – low financial burden, good quality, timely availability, minimal wastage and transparency – that are important to improve access to medicines. Although rational usage of drugs and medical awareness amongst the people is equally important to determine the success of the public procurement systems, this paper only deals with the supply side of the medicines access issue. Accordingly, the objective of the paper is to understand and compare the public drug procurement systems in five Indian states – Kerala, Maharashtra, Odisha, Punjab and Tamil Nadu – on the basis of a set of pre-determined comparison factors. And also explore whether the success of the procurement models depends on some crucial intangible elements beyond the procurement process or price.

## Methodology

The study was designed to compare public drug procurement models of a sample of states on a set of 53 pre-determined parameters. These parameters reflect each of the five main objectives of comparison viz. low financial burden, good quality, timely availability, transparency and wastage elimination through efficient supply chain.

The sample states were chosen to ensure heterogeneity in a number of factors such as procurement type (centralized, decentralized or mixed); autonomy of the procurement organization; state of public health infrastructure; and geography. Based on these parameters, the sample of states initially chosen were Kerala, Tamil Nadu, Maharashtra, Punjab, Uttar Pradesh and West Bengal. Consequently, Right to Information (RTI)<sup>1</sup> applications were sent to the concerned Public Information Officers (PIOs) to seek drug procurement and process data. However, due to lack of data responses despite multiple appeals from Uttar Pradesh and West Bengal, these states were replaced with Orissa. Exhibit 3 provides an overview of the sampling methodology. It is also

<sup>1</sup> Right to information act: Right to Information Act 2005 mandates timely response to citizen requests for government information

noteworthy that some of the sample states are primarily agrarian systems while the others are at different points of industrialization.

*Exhibit 3: Sample states for the study*

| Sampling Attribute           | Kerala           | Tamil Nadu       | Maharashtra             | Orissa           | Punjab                  |
|------------------------------|------------------|------------------|-------------------------|------------------|-------------------------|
| <b>Procurement Type</b>      | Centralized      | Mixed            | Primarily Decentralized | Mixed            | Primarily Decentralized |
| <b>Autonomy</b>              | Fully Autonomous | Fully Autonomous | Government owned        | Government owned | Government owned        |
| <b>Health Infrastructure</b> | Good             | Good             | Poor                    | Poor             | Good                    |
| <b>Geography</b>             | South            | South            | Mid-West                | Mid-East         | North                   |

Procurement type mentioned in the above table is used to refer to the model wherein the state drug procurement budget is divided between centralized and decentralized methods of acquiring medicines. Autonomy refers to the extent of government involvement in the decisions of the procurement organization; “fully autonomous” implies minimal involvement while “government owned” indicates a high degree of involvement. The rating of health infrastructure as ‘good’ and ‘poor’ has been based upon the perceived condition of the infrastructure such as the drug warehouses, transportation facilities, community health center, primary health center and district hospital conditions.

Brief information about the sample states, for an overview of the context, is presented in Exhibit 4.

*Exhibit 4: Overview of Sample States*

| Parameter                                                | Kerala     | Maharashtra | Orissa     | Punjab     | Tamil Nadu |
|----------------------------------------------------------|------------|-------------|------------|------------|------------|
| <b>Total Population</b>                                  | 33,387,677 | 112,372,972 | 41,947,358 | 27,704,236 | 72,138,958 |
| <b>Urban/Rural Population Ratio</b>                      | 91.3%      | 82.6%       | 20.0%      | 60.0%      | 94.0%      |
| <b>Annual Per capita Income</b>                          | 59,179     | 83,471      | 36,923     | 67,473     | 72,993     |
| <b>Annual Per capita Exp. - Rural</b>                    | 22,020     | 13,836      | 9,816      | 19,788     | 13,920     |
| <b>Annual Per capita Exp. - Urban</b>                    | 28,956     | 29,244      | 18,576     | 25,308     | 23,376     |
| <b>Total Per Capita Health Exp.</b>                      | 2,952      | 1,576       | 995        | 1,813      | 933        |
| Public Component %                                       | 10.8%      | 22.1%       | 18.0%      | 18.0%      | 26.6%      |
| Private Component %                                      | 86.3%      | 73.3%       | 79.1%      | 76.1%      | 60.7%      |
| <b>Number of Sub-Centers</b>                             | 4,575      | 10,579      | 6,688      | 2,950      | 8,706      |
| <b>Number of Primary Health Centers</b>                  | 697        | 1816        | 1279       | 394        | 1277       |
| <b>Number of Community Health Centers</b>                | 226        | 376         | 231        | 129        | 256        |
| <b>Number of District Hospitals</b>                      | 14         | 35          | 32         | 20         | 29         |
| <b>Birth Rate (/1000 Population)</b>                     | 14.7       | 17.9        | 21.5       | 17.6       | 15.8       |
| <b>Death Rate (/1000 Population)</b>                     | 6.8        | 6.6         | 9.2        | 7          | 7.2        |
| <b>Infant Mortality Rate (/1000 Live Births)</b>         | 13         | 33          | 71         | 43         | 35         |
| <b>Maternal Mortality Rate (Per 100,000 Live Births)</b> | 110        | 130         | 303        | 192        | 111        |
| <b>Total Fertility Rate (Children Per Woman)</b>         | 1.7        | 2           | 2.4        | 2          | 1.6        |

Source: Census 2011; Level and Pattern of Consumer Expenditure 2009-10 NSSO 66<sup>th</sup> round; Bulletin on Rural Health Statistics in India 2008, MoHFW; Sample Registration Survey 2010-11

Primary data for the study was gathered through key informant analysis, in which semi-structured interviews were conducted with executive leadership teams of the drug procurement cells and public health officials in the sample states in March – April 2012, and RTI responses from sample states. The information gathered from the key informant analysis was corroborated with the field

staff by way of semi-structured interviews with stakeholders of primary health centers, community health centers, and district hospitals, and qualitative observation during the authors' warehouse visits.

Secondary data on expenditures, budgets and indicators was compiled from datasets published by the National Sample Survey Office, Ministry of Health and Family Welfare (Bulletin on Rural Health Statistics in India), and Office of the Registrar General & Census Commissioner of India (Sample Registration Survey). This study is intended to be a qualitative assessment with an objective of framing questions for future research, therefore no statistical techniques were used.

## Findings

The procurement processes followed in the sample states were evaluated against a pre-determined set of 53 parameters (including price). See Exhibit 5 for the list of pre-determined parameters used for comparison.

*Exhibit 5: Overview of Comparison Parameters*

|                                                |                                                                                                                                                                                                                                                                                     |
|------------------------------------------------|-------------------------------------------------------------------------------------------------------------------------------------------------------------------------------------------------------------------------------------------------------------------------------------|
| <b>Overall</b>                                 | <ul style="list-style-type: none"> <li>Legal Status of the Procurement Organization; Drug Procurement Budget; Per Capita Drug Procurement Budget;</li> </ul>                                                                                                                        |
| <b>Essential Drug List</b>                     | <ul style="list-style-type: none"> <li>EDL Customization; EDL Committee Composition; Frequency of EDL Revision; Time for EDL Preparation/ Revision; EDL Categorization; Third Party Review of EDL</li> </ul>                                                                        |
| <b>Demand Estimation &amp; Forecast</b>        | <ul style="list-style-type: none"> <li>Demand Estimation Process; Frequency of Demand Estimation; Methodology for Estimation (Facility Level)</li> </ul>                                                                                                                            |
| <b>Procurement Process</b>                     | <ul style="list-style-type: none"> <li>Procurement mechanism in the state; Financing of Drug Procurement; Emergency Drug Budget Allocation; Bidding Process</li> </ul>                                                                                                              |
| <b>Prequalification Criteria</b>               | <ul style="list-style-type: none"> <li>Min. Turnover Criteria; GMP/WHO-GMP/US-FDA; ISI/BIS/ISO/CE; Assurance of avbl. Production Capacity; Market Standing; Exclusion Criteria; Price Relaxation; Product Reservation; EMD (%); Tenders with no bidders; Supply Schedule</li> </ul> |
| <b>Quality Control</b>                         | <ul style="list-style-type: none"> <li>External Quality Testing Of Every Consignment; Testing Before Distribution; Testing Before Distribution</li> </ul>                                                                                                                           |
| <b>Payment Mechanism</b>                       | <ul style="list-style-type: none"> <li>Payment Department Status; Lead Time For Payment; Prerequisites For Payment Disbursement</li> </ul>                                                                                                                                          |
| <b>Inventory Management &amp; Distribution</b> | <ul style="list-style-type: none"> <li>Facilities Per Warehouse; Scientific Warehousing Practices; Supply Chain Management; Inventory Management; Scientific Forecasting; Flexibility to Alter Indent; Tracking dispatched drugs; Scientific inventory Mgmt. at Facility</li> </ul> |
| <b>Penalties</b>                               | <ul style="list-style-type: none"> <li>Supply Default; Quality Failure; Blacklisting Criteria</li> </ul>                                                                                                                                                                            |
| <b>IT Systems Enablement (of)</b>              | <ul style="list-style-type: none"> <li>Demand Estimation &amp; Forecasting; Tendering Process; Quality Control; Payment Disbursement; Inventory Management (Warehouse); Inventory Management (Facility)</li> </ul>                                                                  |

The detailed comparison tablets on procurement process and prices are presented in Exhibits 6 and 7. In many instances, the process followed is very different from the one given in the manuals. The information captured below relates to the process that are actually followed.

Exhibit 6: Procurement Process Comparison Across the Sample States

| Parameter                                       | Kerala                                                        | Orissa                                                              | Tamil Nadu                           | Punjab                                                 | Maharashtra                                             |
|-------------------------------------------------|---------------------------------------------------------------|---------------------------------------------------------------------|--------------------------------------|--------------------------------------------------------|---------------------------------------------------------|
| <b>Legal Status Of Procurement Organization</b> | Autonomous (KMSCL)                                            | Government Owned (Part Of DHS)                                      | Autonomous (TNMSC)                   | Government Owned (PHSC)                                | Government Owned                                        |
| <b>Drug Procurement Budget (USD)</b>            | 36.3 Million (2011 - 12)                                      | 8.1Million (2010 - 11)                                              | 39.8Million (2010 - 11)              | 3.4 Million (0.4 mil. State Budget + 3 mil. User Fees) | 87.5 Million (2010-11)                                  |
| <b>Per Capita Drug Procurement Budget</b>       | 51                                                            | 8.8                                                                 | 22.5                                 | 5.8                                                    | 35.6                                                    |
| <b>Essential Drug List</b>                      |                                                               |                                                                     |                                      |                                                        |                                                         |
| Customized State EDL                            | Yes                                                           | Yes                                                                 | Yes                                  | Yes                                                    | No, But It Has A Drug List Comprising 1850 Drugs        |
| Composition Of EDL Committee                    | Multistakeholder Committee                                    | Multistakeholder Committee                                          | Multistakeholder Committee           | Multistakeholder Committee                             | Multistakeholder Committee                              |
| Frequency Of EDL Revision                       | 1 Year                                                        | 2 Years                                                             | 1 Year                               | 1 Year                                                 | N/A                                                     |
| Time For EDL Preparation/ Revision              | 2 - 3 Months                                                  | 7 - 8 Months                                                        | 2 - 3 Months                         | 4 Months                                               | N/A                                                     |
| EDL Categorization                              | Yes (8 Product-Based Categories)                              | Yes (2 Demography-Based Lists)                                      | Yes (Product-Based Categories)       | Yes                                                    | N/A                                                     |
| Third Party Review Of EDL                       | No                                                            | Yes (By WHO Experts)                                                | No                                   | No                                                     | N/A                                                     |
| <b>Demand Estimation&amp; Forecast</b>          |                                                               |                                                                     |                                      |                                                        |                                                         |
| Demand Estimation Process                       | Aggregation Of Facility Indents                               | Aggregation Of Facility Indents                                     | Aggregation Of Facility Indents      | Aggregation Of Facility Indents                        | Facility Level Indenting                                |
| Frequency Of Demand Estimation                  | 1 Year                                                        | 1 Year                                                              | 1 Year                               | 1 Year                                                 | 1 Year                                                  |
| Methodology For Estimation (Facility Level)     | 10 - 15% Over Previous Year's Indent; Performed By Pharmacist | No Scientific Method; Usually Performed By Computer Operator/ Clerk | 10% Of The Previous Year Consumption | N/A                                                    | 10% Of Previous Year Consumption                        |
| <b>Procurement Process</b>                      |                                                               |                                                                     |                                      |                                                        |                                                         |
| Procurement Mechanism In The State              | Centralized                                                   | 80% Centralized; 20% Decentralized                                  | 90% Centralized; 10% Decentralized   | 12.5% Centralized;87.5% Decentralized                  | Centralized Rate Contracting ; Decentralized Purchasing |
| Financing Of Drug Procurement                   | State Budget Allocation                                       | State Budget Allocation                                             | State Budget Allocation              | State Budget Allocation & User Charges                 | State Budget Allocation                                 |
| Emergency Drug Budget Allocation                | Yes (Additional Funds Released)                               | No (Purchased From Existing Budget)                                 | Yes (Additional Funds Released)      | No                                                     | Yes (Additional Funds Released)                         |
| <b>Tendering Process</b>                        |                                                               |                                                                     |                                      |                                                        |                                                         |
| Bidding Process                                 | Two Bid System                                                | Two Bid System                                                      | Two Bid System                       | Two Bid System                                         | Two Bid System                                          |

| Prequalification Criteria                                  |                                                                                       |                                                                       |                                                                      |                                                  |                                                                       |
|------------------------------------------------------------|---------------------------------------------------------------------------------------|-----------------------------------------------------------------------|----------------------------------------------------------------------|--------------------------------------------------|-----------------------------------------------------------------------|
| Min. Turnover Criteria (INR/USD)                           | 10 Crore/ 2.1 Million                                                                 | 10 Crore/ 2.1 Million                                                 | 3 Crore/ 0.7 Million                                                 | 50 Crore/ 10.7 Million                           | 10 Crores/ 2.1 Million                                                |
| GMP/ WHO-GMP/ US-FDA                                       | Required                                                                              | Required                                                              | Required                                                             | Required                                         | WHO-GMP Required                                                      |
| ISI/ BIS/ ISO/ CE                                          | Required                                                                              | Required                                                              | N/A                                                                  | N/A                                              | N/A                                                                   |
| Assurance Of Available Production Capacity                 | Required (MPMASS)                                                                     | None                                                                  | Production Capacity Certificate                                      | N/A                                              | Production Capacity Certificate                                       |
| Market Standing                                            | 2 Years                                                                               | 3 Years                                                               | 3 Years                                                              | 3 Years                                          | 3 Years                                                               |
| Exclusion Criteria For Factory Inspections                 | Supply To Premier Institutions                                                        | None                                                                  | None                                                                 | None                                             | N/A                                                                   |
| Price Relaxation For SSIs/ PSUs                            | Yes (SSI - 10%; PSU - 15%)                                                            | Yes (SSI - 10%; Additional 3% For ISO Certification)                  | Yes (SSI - 15%)                                                      | PSU produced Antibiotics                         | None (20% Quantity Reserved If SSI Matches L1 Rate)                   |
| Product Reservation For SSIs/ PSUs                         | None                                                                                  | 31 Items (From SSIs)                                                  | None                                                                 | None                                             | None                                                                  |
| EMD                                                        | 1% Of Tender Value                                                                    | 1 - 5% Of Tender Value                                                | 1% of Tender value (maximum upto 50,000 INR), expemted for SSI       | Differs For Each Drug                            | INR 25,000                                                            |
| Process For Tenders With No Bidders (In Order Of Priority) | Re-Tender (Revised Pre-Qualifications); Limited Tender; Short Tender; Direct Purchase | Re-Tender (Same Pre-Qualifications) - Open Until Bids Are Received    | Re-tender (Limited and Short tender process is used)                 | Pharmacy Based Purchasing                        | Re-Tendering, Limited Tendering Or Direct Purchase                    |
| Supply Schedule                                            | 60 Days - 40% Of PO Quantity; 90 Days - 70%; 120 Days - 100%                          | 60 Days - 50% Of PO Quantity; Rest Before Specified Date              | Starting from 30 days and has to end by 60 days, otherwise specified | 30 days to 3 months from the time of issue of PO | Within 3 Months From The Issue Of PO                                  |
| Quality Control                                            |                                                                                       |                                                                       |                                                                      |                                                  |                                                                       |
| External Quality Testing Of Every Consignment              | Empanelled Private Labs                                                               | No External Quality Testing (Supplier's Internal Quality Certificate) | Empanelled Private and government labs                               | Empanelled Government Labs                       | No External Quality Testing (Supplier's Internal Quality Certificate) |
| Testing Before Distribution                                | Mandatory                                                                             | Not Mandatory                                                         | Mandatory                                                            | Mandatory                                        | Not Mandatory                                                         |
| Lead Time For Quality Testing                              | ~ 15 Days                                                                             | Within 8 Weeks                                                        | 15 Days For Tablets And Capsules; 1 Month For Suspensions            | 1 Month                                          | N/A                                                                   |
| Payment Mechanism                                          |                                                                                       |                                                                       |                                                                      |                                                  |                                                                       |
| Payment Department Status                                  | Autonomous (Managed By Contractual Staff)                                             | Government (Account General's Office)                                 | Autonomous (Managed By Contractual Staff)-IT enabled                 | Government                                       | Government (Directorate Of Accounts And Treasuries)                   |



|                                                     |                                                                                                                  |                                                                       |                                                          |                                                            |                                                                                                                               |
|-----------------------------------------------------|------------------------------------------------------------------------------------------------------------------|-----------------------------------------------------------------------|----------------------------------------------------------|------------------------------------------------------------|-------------------------------------------------------------------------------------------------------------------------------|
| Lead Time For Payment                               | ~ 30 Days                                                                                                        | ~90 Days                                                              | 30 Days                                                  | Min. 30 Days                                               | ~ 90 Days                                                                                                                     |
| Prerequisites For Payment Disbursement              | Warehouse Material Receipt, External Quality Certificate                                                         | Warehouse Material Receipt, Supplier's Internal Quality Certificate   | Warehouse Material Receipt, External Quality Certificate | Warehouse Material Receipt, Quality Certificates From Labs | Facility Material Receipt, Internal Quality Certificate                                                                       |
| <b>Inventory Mgmt. &amp; Distribution</b>           |                                                                                                                  |                                                                       |                                                          |                                                            |                                                                                                                               |
| Facilities (All) Catered To Per Warehouse (Average) | ~290                                                                                                             | ~235                                                                  | ~411                                                     | N/A                                                        | N/A                                                                                                                           |
| Scientific Warehousing Practices                    | Yes                                                                                                              | No                                                                    | Yes                                                      | No                                                         | No                                                                                                                            |
| In-House/ Outsourced Supply Chain Management        | Outsourced                                                                                                       | In-House                                                              | In-House                                                 | In-House                                                   | In-House (Facility Level)                                                                                                     |
| Inventory Management                                | Dynamic (Flexibility Of 2nd PO)                                                                                  | Static (Only Single PO Is Issued)                                     | Dynamic (Flexibility Of 2nd PO)                          | Static                                                     | 25% Flexibility For Quantity Maintained                                                                                       |
| Scientific Consumption/ Inventory Forecasting       | Yes (Inventory Management Software)                                                                              | No                                                                    | Yes (Inventory Management Software)                      | No                                                         | No                                                                                                                            |
| Flexibility For Facilities To Alter Indent          | Yes (Just Before Dispatch)                                                                                       | No                                                                    | Yes                                                      | Yes                                                        | No                                                                                                                            |
| Tracking Dispatched/ Delivered Drugs                | Currently Passbook (Volume Based; Online In Future)                                                              | No Tracking                                                           | Passbook (Value Based)                                   | N/A                                                        | No                                                                                                                            |
| (Scientific) Inventory Management At Facility       | No (Online In Future)                                                                                            | No                                                                    | Use First in First Out (FIFO) principle                  | No                                                         | No                                                                                                                            |
| <b>Penalty</b>                                      |                                                                                                                  |                                                                       |                                                          |                                                            |                                                                                                                               |
| Penalty For Supply Schedule Default                 | 10% Of The Unexecuted Supply; Unexecuted Supply Purchased At The Cost Of Supplier In Case Of Inability To Supply | N/A                                                                   | 0.5% per day to maximum of 15% of the tender amount      | N/A                                                        | 0.5% Of The Value Of Unsupplied Goods Per Week Up To 5 Weeks, After Which Unexecuted Supply Purchased At The Cost Of Supplier |
| Penalty For Quality Failure                         | Supplier Blacklisted With Forfeiture Of Security Deposit                                                         | Suppliers Have To Replace The Entire PO Quantity Or Risk Blacklisting | Supplier Blacklisted With Forfeiture Of Security Deposit | Forfeiture Of EMD                                          | Supplier Blacklisted With Forfeiture Of Security Deposit                                                                      |



| Blacklisting Criteria                      | Defaulting On 3 POs Or More With Less Than 50% Supply; Blacklisted By Any Other Procurement Agency On Quality Grounds | Quality Failure After Material Supply | Defaulting Continuously on 3 POs With Less Than 50% Supply, Quality Failure, Blacklisted By National Or Other State Level Agencies | Defaulting Continuously on 3 POs With Less Than 50% Supply, Quality Failure, Blacklisted By National Or Other State Level Agencies | Supply Default After Extension Period; Quality Failure |
|--------------------------------------------|-----------------------------------------------------------------------------------------------------------------------|---------------------------------------|------------------------------------------------------------------------------------------------------------------------------------|------------------------------------------------------------------------------------------------------------------------------------|--------------------------------------------------------|
| <b>IT Enablement Processes:</b>            |                                                                                                                       |                                       |                                                                                                                                    |                                                                                                                                    |                                                        |
| <b>Demand Estimation &amp; Forecasting</b> | Yes                                                                                                                   | No                                    | Yes                                                                                                                                | No                                                                                                                                 | No                                                     |
| <b>Tendering Process</b>                   | Yes                                                                                                                   | No                                    | Yes                                                                                                                                | No                                                                                                                                 | Yes                                                    |
| <b>Quality Control</b>                     |                                                                                                                       | No                                    | Yes                                                                                                                                | No                                                                                                                                 | No                                                     |
| <b>Payment Disbursement</b>                | Yes                                                                                                                   | No                                    | Yes                                                                                                                                | No                                                                                                                                 | No                                                     |
| <b>Inventory Management (Warehouse)</b>    | Yes                                                                                                                   | Yes                                   | Yes                                                                                                                                | No                                                                                                                                 | No                                                     |
| <b>Inventory Management (Facility)</b>     | No                                                                                                                    | No                                    | Yes                                                                                                                                | No                                                                                                                                 | No                                                     |

*Exhibit 7: Price Comparison of 32 Randomly Selected Drugs Across the Sample States*

| Name of Drug      | Dosage                    | Unit    | Price (INR) |                 |             |                  |             |
|-------------------|---------------------------|---------|-------------|-----------------|-------------|------------------|-------------|
|                   |                           |         | Kerala 2012 | Tamil Nadu 2012 | Odisha 2009 | Maharashtra 2011 | Punjab 2010 |
| Adrenaline        | 1mg/1 ml                  | Ampoule | 2.89        | 1.21            | 1.46        | 1.80             | n/a         |
| Albendazole       | 400 mg                    | Tablet  | 0.81        | 0.57            | 0.49        | 0.61             | 0.64        |
| Aminophylline     | 25 mg/ml                  | Ampoule | n/a         | 2.60            | 2.91        | 4.90             | n/a         |
| Amitriptyline     | 25 mg                     | Tablet  | 0.22        | 0.15            | 0.15        | 0.19             | n/a         |
| Amlodipine        | 5 mg                      | Tablet  | 0.16        | 0.06            | 0.09        | 0.10             | 0.13        |
| Atenolol          | 50 mg                     | Tablet  | 0.125       | 0.11            | 0.13        | 0.14             | 0.14        |
| Benzyl Penicillin | 10 Lakh IU                | Vial    | 3.68        | 3.08            | 4.20        | 4.88             | n/a         |
| Carbamazepine     | 200 mg                    | Tablet  | 0.59        | 0.54            | 0.42        | 0.53             | n/a         |
| Cefotaxime        | 250 mg                    | Vial    | 4.73        | 3.94            | 5.40        | 5.14             | n/a         |
| Ciprofloxacin     | 500 mg                    | Tablet  | 1.09        | 1.04            | 0.87        | 1.07             | 1.86        |
| Co-trimoxazole    | 40mg+<br>200mg<br>per 5ml | Bottle  | n/a         | 5.91            | 5.90        | 6.74             | n/a         |
| Diclofenac        | 25 mg/ml                  | Ampoule | 1.33        | 1.08            | 1.04        | 1.40             | 2.70        |
| Dicyclomine       | 10 mg/ml                  | Ampoule | 1.34        | 0.88            | 1.17        | 1.37             | n/a         |

|                                   |           |         |      |       |       |       |      |
|-----------------------------------|-----------|---------|------|-------|-------|-------|------|
| <b>Dopamine</b>                   | 40 mg/ml  | Vial    | 6.4  | 5.40  | 5.53  | 7.87  | n/a  |
| <b>Erythromycin</b>               | 250 mg    | Tablet  | 1.27 | 1.23  | 0.81  | 1.03  | n/a  |
| <b>Folic Acid</b>                 | 5 mg      | Tablet  | 0.06 | 0.06  | 0.06  | 0.08  | 0.05 |
| <b>Gamma Benzene Hexachloride</b> | 1% w/v    | Bottle  | 12.5 | 9.63  | 12.77 | 10.18 | n/a  |
| <b>Glibenclamide</b>              | 5 mg      | Tablet  | 0.12 | 0.07  | 0.08  | 0.08  | n/a  |
| <b>Glycopyrrolate</b>             | 0.2 mg/ml | Ampoule | 5.22 | 1.65  | 3.25  | 3.51  | n/a  |
| <b>Hydrocortisone</b>             | 100 mg    | Vial    | 11   | 10.50 | 7.45  | 11.38 | 7.39 |
| <b>Ketamine</b>                   | 50 mg/ml  | Vial    | n/a  | 16.27 | 14.60 | 17.10 | n/a  |
| <b>Lignocaine</b>                 | 2% w/v    | Vial    | 7.75 | 4.54  | 3.80  | 6.30  | 4.40 |
| <b>Metformin</b>                  | 500 mg    | Tablet  | 0.24 | 0.19  | 0.18  | 0.19  | n/a  |
| <b>Methyl Ergometrine</b>         | 0.2 mg/ml | Ampoule | 1.85 | 1.33  | 1.71  | 2.75  | n/a  |
| <b>Norfloxacin</b>                | 400 mg    | Tablet  | 0.78 | 0.79  | 0.57  | 0.76  | n/a  |
| <b>Oxytocin</b>                   | 5 IU/ml   | Ampoule | n/a  | 1.16  | 1.65  | 1.51  | n/a  |
| <b>Pentazocine</b>                | 30 mg/ml  | Ampoule | 3.05 | 2.41  | 2.58  | 3.51  | 3.60 |
| <b>Phenobarbitone</b>             | 30 mg     | Tablet  | 0.28 | 0.09  | 0.12  | 1.43  | 0.11 |
| <b>Phenytoin</b>                  | 100 mg    | Tablet  | 0.36 | 0.16  | 0.11  | 1.60  | n/a  |
| <b>Promethazine</b>               | 25 mg     | Ampoule | 1.68 | 1.19  | 1.10  | 1.60  | n/a  |
| <b>Ranitidine</b>                 | 50 mg     | Ampoule | 1.31 | 0.81  | 0.98  | 1.40  | 2.20 |
| <b>Thiopentone</b>                | 500 mg    | Ampoule | 21.5 | 16.60 | 17.20 | 11.85 | n/a  |

## Discussion

An efficient drug distribution system ensures the **right medicines** in **sufficient quantities** procured at **lowest prices** to secure the **maximum therapeutic value** to the **largest number of beneficiaries** with the **available & additional resources**.

Broadly speaking, the two main beneficiaries in this context are the government and the patient. On one hand, rationality dictates that any government in a resource-constrained setting would expect that an effective procurement system would ensure availability of quality medicines while optimizing the finances to ensure best outcomes. It is also in the interest of the government to run this system transparently to promote competition and thus efficiency. On the other hand, a patient expects that good quality medicines are available at all time, free of cost. (See Exhibit 8 for an expectation map of both beneficiaries). Leadership, technical capability and information technology overarching the expectations in the exhibit below are the pre-requisites for running a system efficiently. The capability of each states' procurement system to enhance IT usage and administrative capabilities driven by a strong leader is pre-requisite.

*Exhibit 8: Combined Expectation Mapping of Beneficiaries of a Public Procurement System*

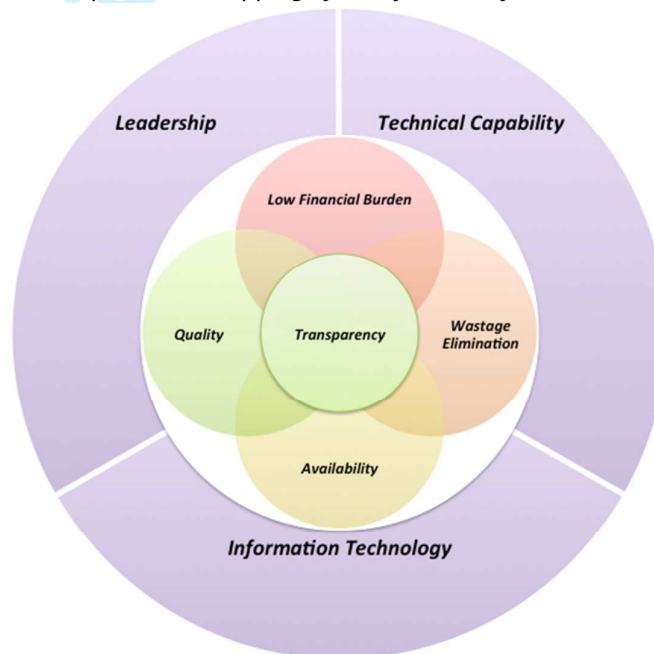

### Low Financial Burden

Low financial burden to the government ex-chequer is an important aspect of the public drug procurement systems because of limited resources. Some of the parameters amongst the 53 comparatives that reflect a procurement system's capacity to reduce financial burden are the extent of capital expenditure for establishing the systems, costs for procurement, storage and transportation, the preciseness of the Essential Drug List (EDL) to suit the state health burden and finally the prices at which drugs are procured.

The procurement process adopted bears some strong repercussions on the budgets, which include both the capital expenditures and operating expenditure to run the system. For completely/predominantly centralized pooled procurement models like Tamil Nadu, Kerala and Odisha it is imperative to have an optimum number of warehouses to cater to all the public health facilities.

1  
2  
3 Additionally, the system requires adequate transportation facilities to transfer supplies from  
4 warehouses to user institutions and IT enablement to manage the entire system necessitating a  
5 considerable initial capital expenditure. With a budget of INR 39.8 Million USD and USD 36.3 Million  
6 in FY2010 for Tamil Nadu and Kerala respectively, the states have been able to make capital  
7 investments – this also includes the cash surplus generated through management fees the  
8 autonomous procurement agencies charge. Kerala has about 19 warehouses while Tamil Nadu about  
9 25, most of which comply with scientific standards of inventory management. Odisha, with a budget  
10 of INR USD 8.1 Million for FY2011, is unable to make the necessary investments to fully realize the  
11 benefits of centralized pooled procurement.  
12

13  
14 Maharashtra follows the system of centralized rate contracting and decentralized purchasing where  
15 the suppliers directly deliver the medicines to the facilities. While transportation costs are not borne  
16 by the state, its cost is built into the drug price. This system also requires significantly large storage  
17 facilities at each user institution thereby increasing the overall cost. Punjab was not considered into  
18 this analysis because it follows a mixed system with drugs worth about USD 0.4 Million being  
19 purchased in a centralized manner while user charges collected by district hospitals accounting for  
20 USD 3 Million are utilized to directly purchase drugs from the open market.  
21

22 A well-formulated and localized EDL is imperative to make optimal use of the limited financial  
23 resources. Tamil Nadu, Kerala and Odisha purchase about 260 drugs each year as a part of EDL while  
24 in Maharashtra centralized rate contracting (decentralized purchasing) is done for about 1,850 drugs.  
25 Though the decentralized purchasing model offers more flexibility for facilities, the administrative  
26 costs of finalizing rate contracts for 1,850 drugs and empanelling the suppliers is by no measure  
27 insignificant.  
28

29  
30 Finally – drug price: the largest expenditure component. Theoretically, centralized procurement  
31 offers volume discounts thereby reducing the financial burden; however Annexure 2 comparing  
32 prices of 32 drugs across the five states reveals that Tamil Nadu may not necessarily have the lowest  
33 price despite greater quantities. Despite the bulk discounts, some drugs are cheaper in states with  
34 arguably inefficient centralized/ predominantly centralized models like Odisha and Punjab and states  
35 with decentralized models like Maharashtra. Due to larger population, public preference towards  
36 the government's health system and good health infrastructure, it is safe to assume that the  
37 quantities for procurement in Tamil Nadu would be significantly higher than Odisha, Kerala or  
38 Punjab. Then the question that remains unanswered is how are the other states able to procure at  
39 prices lower than Tamil Nadu? The reasons could be many. For instance, supplier location – more  
40 than half of the suppliers to Tamil Nadu are from within the state. The same statistic for Kerala is  
41 14%, Maharashtra 34% and for Odisha, a surprising zero percent! With insufficient data, we are  
42 unable to confidently conclude the financial burden of all the variants of the procurement models.  
43 But perhaps this is a good lead to think about what is causing unexpected discrepancies in prices?  
44  
45

### 46 **Wastage Elimination**

47 Eliminating wastage of drugs (through mishandling or expiry) is necessary (but not sufficient) to  
48 optimize expenditure and ensure availability. Eliminating wastage is predicated upon effective  
49 inventory management, which deals with requirement gathering, analyzing consumption patterns  
50 and forecasting demand. Trained pharmacists using weekly, quarterly and annual consumption data  
51 are supposed to do the demand estimation each year. However in reality, the previous year's data is  
52 inflated by 10 – 15% in most states. In Odisha, however, owing to the lack of trained personnel,  
53 clerks/ computer operators perform these tasks.  
54

55  
56 Kerala was able to mitigate this inaccuracy in estimation by introducing the option of issuing a  
57 second purchase order (PO). The initial PO given to the supplier is only for 75% of the tender  
58 quantity. The procurement authorities have the privilege of either not issuing the second PO or  
59  
60

1  
2  
3 issuing the second PO for 25% or 50% of the tender quantity thereby building in a flexibility of 25%.  
4 All other states have a rather static inventory management.  
5

6 Furthermore, Kerala and Tamil Nadu use software tools to monitor stock levels and manage  
7 inventory and distribution. The warehouses in Punjab, Odisha and Maharashtra manually manage  
8 the inventory by recording data into ledgers. These systems are not designed to store all types of  
9 drugs in a scientific manner. These practices not only lead to wastage of material but also precious  
10 warehouse space (in case of over-supply).  
11

### 12 **Availability**

13 In the centralized model of pooled procurement, the distribution is managed centrally and the onus  
14 of the procurement agency is to ensure availability at the user institutions. The public health centers  
15 in Punjab and Maharashtra are at the mercy of the suppliers, owing to their decentralized  
16 purchasing model, whose supply is often sporadic due to various reasons like delayed payments, lack  
17 of proper planning etc. This impacts availability at the time of need and could potentially lead to  
18 wastage.  
19

### 20 **Quality**

21 A procurement organization has two levers to ensure that only quality drugs enter the system: a)  
22 Pre-qualification criteria to filter out unqualified suppliers b) External quality testing protocols.  
23 When these levers are used together, quality is ensured while still keeping the prices low. States that  
24 have stringent external quality testing protocols can afford to keep the minimum turnover criterion  
25 low. For instance, Tamil Nadu has empanelled laboratories to which every sample from each batch is  
26 sent for quality testing before distributing to user institutions and the minimum turnover criteria is  
27 set at USD 0.7 Million (INR 3 Crores). Kerala too has similar quality testing protocols but has a higher  
28 minimum turnover criteria (set at USD 2.1 Million/ INR 10 crores) to enforce faith into the public  
29 system. Odisha and Maharashtra do not have any quality testing protocols in place, apart from the  
30 supplier's internal quality certificate, and have therefore set the minimum turnover criterion at INR  
31 10 crores, assuming that higher volumes are more likely to be generated by suppliers with high  
32 quality products.  
33

34  
35  
36 Additionally, states that have external quality testing protocols also have policies that provide price  
37 relaxation to Small Scale Industries (SSIs) and Public Sector Undertakings (PSUs) to encourage local  
38 industry. Such preference treatment doesn't exist in Odisha or Punjab. Maharashtra reserves 20% of  
39 quantities to SSIs only if they match the L1 rates and thus do not get any price preferences.  
40

41 An important aspect of the pre-qualification criteria is also the GMP (good manufacturing practices)  
42 certificate. This certificate ensures that the facility follows the stipulated guidelines according to the  
43 industrial benchmarks and thus can ascertain a certain level of quality. Maharashtra demands a  
44 WHO-GMP certificate which is deemed to be more strict and reviewed every two years.  
45

### 46 **Transparency**

47 A public procurement system is accountable to various stakeholders and it is important that  
48 transparency is maintained in all its activities. Certain conditions need to be established for a more  
49 open and efficient functioning. TNMSC and KMCL are autonomous organisations that are headed  
50 by an appointed Director who maybe a civil services officer with a very good technical and  
51 administrative background. The idea of having an autonomous organisation in the public sector may  
52 enable it to function more transparently by avoiding the plausible procedural delays and also to be  
53 able to make decisions of contracting and outsourcing as best suited for the prosperity of the  
54 organisation. On the other hand, Odisha, Punjab and Maharashtra have procurement cells that are a  
55 part of the Directorate of Health Services (DHS) in the state. A clear difference in the efficiency of  
56 the processes can be seen between the autonomous organisations and the state run organisations –  
57  
58  
59  
60

1  
2  
3 In terms of lead times for payments, quality control and in the usage of IT systems and so on. In an  
4 autonomous system, most of the staff are contractual based on their technical capabilities which  
5 may not be the case in state run procurement organizations.  
6

7  
8 A multistakeholdership in the organisation may be useful tool for bringing in more transparency and  
9 representation provided it is well coordinated. Right from the formation of the essential drugs list  
10 (EDL) to the award of the tenders, open and multi-stakeholder decision making may help keep the  
11 system become more transparent. All the states under the purview of the study have a multi-  
12 stakeholder decision making body.  
13

14 It is deemed to be a good practice to have a separate payment processing team from the tender  
15 award team in order to keep transactions more transparent. All the states issue the payment based  
16 on the receipt of stock in the warehouse and a quality certificate (either internal or external). The  
17 processing of payments through the public channels like (Auditor General's Office or Directorate of  
18 Accounts & Treasury) usually takes much longer, as noted in Maharashtra, Odisha and Punjab  
19 compared to the autonomous payment departments of TNMSC and KMSCL.  
20

## 21 22 Conclusion

23  
24 In conclusion, we opine that the critical success factors of each model need to be carefully analyzed  
25 to see if they are valid in the state contexts. It is important for policy makers to understand in detail  
26 the tangible and intangible aspects that go into running a successful model before trying to replicate  
27 it. Also, in some states the existing structures may be serving the purpose but there maybe a need to  
28 do and undo several aspects of the current method of procurement, to make it more efficient.  
29 Sometimes, scrapping existing structures for new procedures may be a herculean task, which needs  
30 to be well thought out before undertaking. Based on the qualitative observations made, the authors  
31 assert that some of the critical success factors that define the success of any procurement system  
32 are: effective leadership and political support; multi-stakeholder participation for political buy-in;  
33 sufficient budget allocation to meet drug demand and administrative costs; outsourcing of non-core  
34 services like IT, quality testing, supply chain management etc.; autonomy procurement agency, well  
35 defined & localized EDL; scientific demand estimation and forecasting; effective pre-qualification  
36 criteria to promote competition and enforce quality; protocols for regular inspection of supplier  
37 premises; mandatory external quality testing; prompt payment to suppliers; autonomous payment  
38 body; scientific warehousing & inventory management; real time stock monitory (both at warehouse  
39 and facility level); and robust IT systems.  
40  
41  
42

## 43 Limitations of the study

44 Despite an effort to draw inferences from various primary and secondary sources, the study has  
45 some limitations that are mentioned below:  
46

- 47 • Availability of essential medicines at the public health facilities was not assessed a a part of  
48 this study. It is the primary indicator of efficacy of a procurement system so all the  
49 qualitative findings mentioned in the paper will have to recognize the lack of this data and  
50 interpret the findings appropriately
- 51 • Time and resource constraints have limited our primary data to two districts in each State.  
52 However, efforts were made to include both urban and rural ones in the study
- 53 • Quantifying the 'impact' of each of the procurement systems is rather ambiguous due to the  
54 lack of concrete indicators to record aspects like corruption, governance and so on. Thus,  
55 this section is qualitatively recorded with the help of a few indicators composed based on  
56 existing literature and some aspects specific to public procurement systems  
57  
58  
59  
60

## Works Cited

- Cameron, A., Ewen, M., Ross-Degnan, D., Ball, D., & Laing, R. (2009). Medicines prices, availability and affordability in 36 developing and middle-income countries: a secondary analysis. *Lancet* , 240-249.
- CDSCO. (2009). *Report on Country-Wide Survey of Spurious Drugs*. New-Delhi: CDSCO, MoHFW.
- Khan, A., & Ghilzai, N. (2007). Counterfeit and Substandard Quality of drugs: The need for an effective and stringent regulatory control in India and other developing countries. *Indian J Pharmacol* , 206-207.
- Kotwani, A., Ewen, M., Dey, D., Iyer, S., Lakshmi, P., Patel, A., et al. (2007). Prices and availability of common medicines at six sites in India using standard methodology. *Indian Journal of Med Res* , 645-654.
- Narayanan, D. (2010 йил 27-July). Tamil Nadu Medical Services Corporation: A Success Story. *Forbes India* .
- Patel, V., Vaidya, R., Naik, D., & Borker, P. (2005). Irrational Drug Use in India: A Prescription Survey from Goa. *Journal of Postgraduate medicine* , 9-12.
- Russell, S. (2004). The Economic Burden of Illness for Households in Developing Countries: A Review of Studies Focussing on Malaria, Tuberculosis and Human Immunodeficiency Virus / Acquired Immunodeficiency Syndrome. *American Journal of Tropical Medicine and Hygiene* , 147-155.
- Selveraj, S., & Karan, A. (2009). Deepening Health Insecurity in India: Evidence from National Sample Surveys Since 1980's. *Economic and Political Weekly* , 55-60.
- Selveraj, S., & Nabar, V. (2010). Access to medicines in India: Issues, Challenges and Response. In A. Mahal, B. Debroy, & L. Ihandri, *India Health Report 2010*. New Delhi.
- TNMSC. (2010 йил 15-July). Retrieved 2012 йил 28-March from TNMSC News Bulletin: <http://www.tnmisc.com/tnmisc/publication/July2010.pdf>
- UNDG. (2003). *Indicators for Monitoring the Millennium Development Goals*. New York: United Nations.
- USAID. (2006). *Procurement Strategies for Health Commodities*. Arlington: DELIVER.
- WHO. (2004). *The World Medicines Situation*. WHO. WHO.
- Yadav, P., Stapleton, O., & Wassenhove, L. N. (2011). *Always Cola, Rarely Essential Medicines: Comparing Medicine and Consumer Product Supply Chain in the Developing World*. INSEAD.

## Authors' Contributions

- Prabal Vikram Singh: Involved in the conceptualization and study design, and analysis of findings.
- Anand Tatambhotla: Involved in the conceptualization and study design, field data collection and analysis of findings.



- Rohini Kalvakuntla: Involved in the conceptualization and study design, field data collection and analysis of findings.
- Maulik Chokshi: Involved in the conceptualization and study design, and analysis of findings.

For peer review only



## Title

Understanding public drug procurement in India – A comparative study of five Indian states

## Abstract

India is in the midst of metamorphosis of its health policies to achieve universal healthcare and access to essential medicines is one of its critical mandates. Much discussion has risen on the need to strengthen the public drug procurement systems at the state levels in order to ensure good quality and timely supply of essential drugs at all public health facilities. Different states in India follow different public procurement systems ranging from centralized pooled procurement to decentralized procurement. This study aims ~~to compare and contrast~~ perform an initial comparison, predominantly qualitative, between the different procurement models ~~and their detailed implications on price of the drugs procured, supply chain management, cost effectiveness of the system to frame questions for future research in order to provide some key points to policy maker this area.~~ The finer differences between the state models, even though seemingly similar from the outside impact access to medicines for people hugely and this has been captured in the study. The five states ~~for included in~~ — Tamil Nadu, Kerala, Odisha, Punjab and Maharashtra were chosen to ensure heterogeneity in a number of factors: a) Procurement Type; b) Autonomy such as procurement type (centralized, decentralized or mixed); autonomy of the procurement organization; c) State state of public health infrastructure; and d) Public health care budgets. ~~The methodology adopted for this study is based geography. Data on both secondary data and primary data procurement processes was collected from state procurement cells and also from 4 facilities through key informant analysis by way of semi-structured interviews with leadership teams of procuring organizations. This process data was validated through interviews with field staff (stakeholders of district hospital, a hospitals, taluk hospital, Community healthcare center and Primary healthcare center hospitals, community health centers, and primary health centers) in each state. Data on procurement price was assimilated by way of RTI responses from state public information officers.~~ The procurement processes in each state were compared across 52 ~~process related factors and on price of the drugs procured. Such a detailed analysis revealed pre-determined parameters. The analysis indicated~~ that autonomous procurement organizations were more efficient in relation to payments to suppliers, had relatively lower drug procurement prices and managed their inventory more scientifically. ~~The tables showcased in the study reveals some interesting correlations between process parameters and efficiency of the systems; some intuitive as well as counter intuitive observations that need to be further probed into. Furthermore, the authors highlight critical success factors that significantly influence the outcome of any procurement model.~~ In a way, this study raises more questions and seeks the need for further research in this arena.

Formatted: English (India)

**Introduction**

Over the years India has seen a tremendous growth in the pharmaceutical sector yet it is grappling with a large population that is denied basic access to healthcare and essential medicines. According to a WHO report on World’s medicines situation (WHO, 2004) almost 68% of the people in India have limited or no access to essential medicines. Inadequate medicine access poses a major barrier to the objective of delivering essential healthcare and the more recently talked about universal healthcare. According to United Nations Development Group (UNDG, 2003), medicine access is defined as “having medicines continuously available and affordable at public or private health facilities or medicine outlets that are within one hour walk from the homes of the people”. Fulfilment of all these factors is arguably low in developing countries like in India. Exhibit 1 shows the decreasing trend in the supply of free medicines since 1986 and also a corresponding increase in the number of people not receiving any medicines at all for out-patient care.

*Exhibit 1: Access to medicines in India*

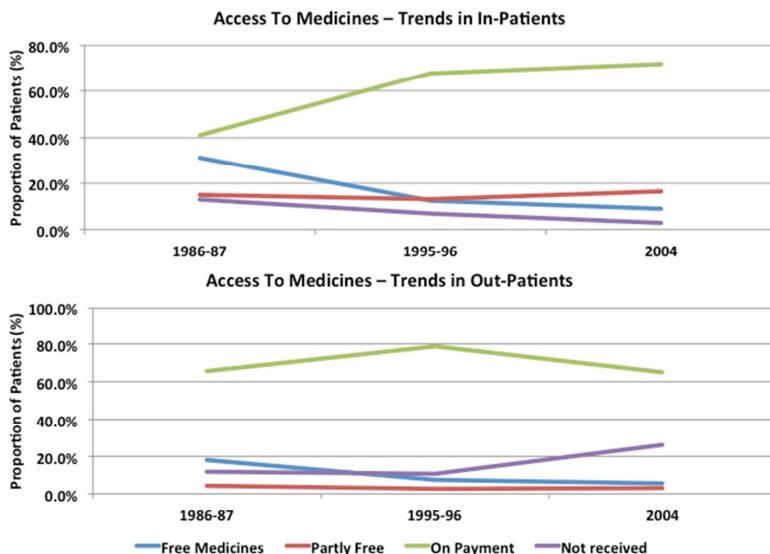

Source: Health data extracted from National Sample Survey Rounds 60, 52, and 42

Formatted: Font: 11 pt

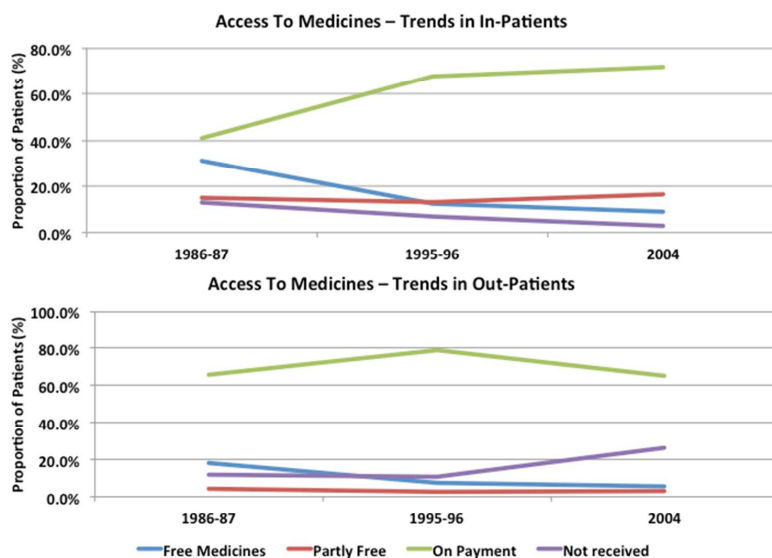

Source: Health data extracted from National Sample Survey Rounds 60, 52, and 42

Private health expenditure constitutes almost 70% of the total health expenditure of which drugs form a massive component anywhere between 20-65% in India and other transitional economies compared to 18% in OPEC countries (Cameron, Ewen, Ross-Degnan, Ball, & Laing, 2009). The burden of purchasing medicines is very high in India accounting for the second largest bulk of expenditure after food. The high cost of medicine purchase in India and relatively low public health investment is exacerbating the lack of essential medicines access in India. It is now well known, accepted and documented that out-of-pocket (OOP) payment for health care has pushed many people into poverty. Bearing the costs of a single hospitalization, 35% of people fall below the poverty line and out-of-pocket medical costs alone may push 2.2% of the population below the poverty line in one year. (*India – Raising the Sights: Better Health Systems for India's Poor*, World Bank, 2001). Exhibit 2 below gives a glimpse of the health care spending in India for 2004-05 across various states.

Exhibit 2: Healthcare Spending in India 2004-05 (Figures in INR)

Formatted: Left

Formatted: Font: 11 pt

1  
2  
3  
4  
5  
6  
7  
8  
9  
10  
11  
12  
13  
14  
15  
16  
17  
18  
19  
20  
21  
22  
23  
24  
25  
26  
27  
28  
29  
30  
31  
32  
33  
34  
35  
36  
37  
38  
39  
40  
41  
42  
43  
44  
45  
46  
47  
48  
49  
50  
51  
52  
53  
54  
55  
56  
57  
58  
59  
60

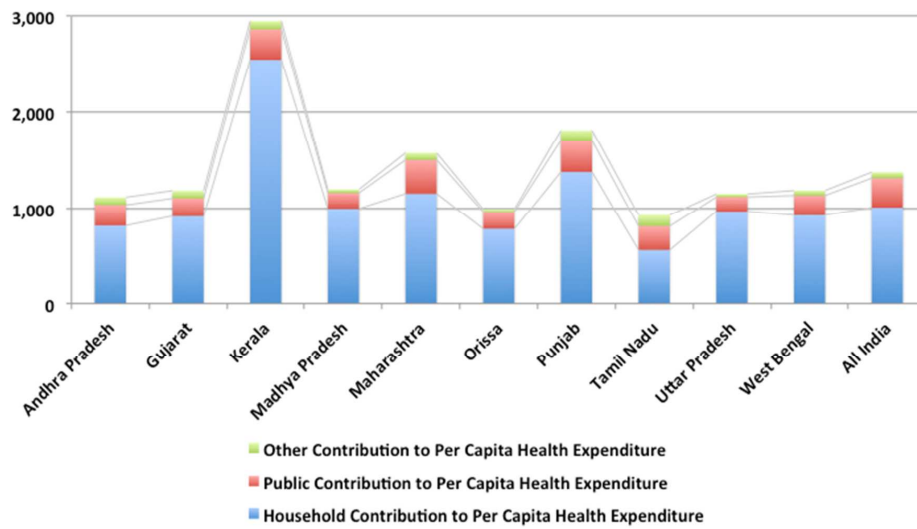

Source: Report of National Commission on Macroeconomics and Health, GOI 2005

Formatted: Font: Calibri, 11 pt

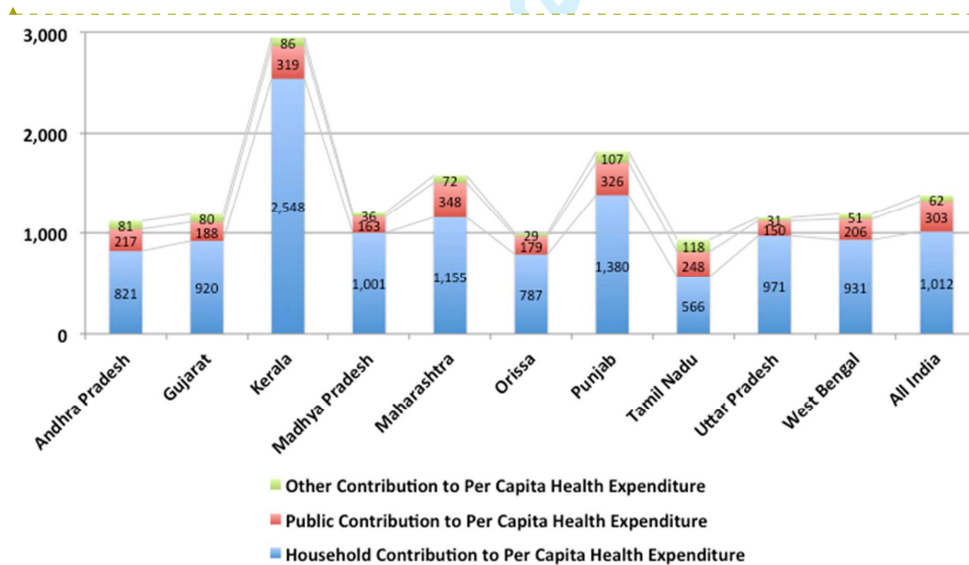

Source: Report of the National Commission on Macroeconomics and Health, Government of India, 2005

Strengthening the public sector availability of quality drugs willis one of the long-term, sustainable ways to relieve a large number of people to whom medical expenditure may be catastrophic. This paper, focussing on the public drug procurement models in India, will detail five main factors of the systems – low financial burden, good quality, timely availability, minimal wastage and transparency – that are important to improve access to medicines. Although rational usage of drugs and medical awareness amongst the people is equally important to determine the success of the public procurement systems, this paper only deals with the supply side of the medicines access issue. Accordingly, the objective of the paper is to understand and compare the public drug procurement systems in five Indian states – Kerala, Maharashtra, Odisha, Punjab and Tamil Nadu – on the basis of

a set of pre-determined comparison factors. And also explore whether the success of the procurement models depends on some crucial intangible elements beyond the procurement process or price.

## Methodology

The study was designed to compare public drug procurement models of a sample of states on a set of 53 pre-determined parameters. These parameters reflect each of the five main objectives of comparison viz. low financial burden, good quality, timely availability, transparency and wastage elimination through efficient supply chain.

The sample states were chosen to ensure heterogeneity in a number of factors: ~~a) Procurement Type such as procurement type~~ (centralized, decentralized or mixed); ~~b) Autonomy~~ of the procurement organization; ~~c) State~~ of public health infrastructure; and ~~d) Public health care budgets~~ ~~geography~~. Based on these parameters, the sample of states initially chosen were Kerala, Tamil Nadu, Maharashtra, Punjab, Uttar Pradesh and West Bengal. Consequently, Right to Information (RTI)<sup>1</sup> applications were sent to the concerned Public Information Officers (PIOs) to seek drug procurement and process data. However, due to lack of data responses despite multiple appeals from Uttar Pradesh and West Bengal, these states were replaced with Orissa. ~~(See Exhibit 3). Exhibit 3 provides an overview of the sampling methodology. It is also noteworthy that some of the sample states are primarily agrarian systems while the others are at different points of industrialization.~~

*Exhibit 3: Sample states for the study*

| Sampling Attribute           | Kerala           | Tamil Nadu       | Maharashtra             | Orissa           | Punjab                  |
|------------------------------|------------------|------------------|-------------------------|------------------|-------------------------|
| <b>Procurement Type</b>      | Centralized      | Mixed            | Primarily Decentralized | Mixed            | Primarily Decentralized |
| <b>Autonomy</b>              | Fully Autonomous | Fully Autonomous | Government owned        | Government owned | Government owned        |
| <b>Health Infrastructure</b> | Good             | Good             | Poor                    | Poor             | Good                    |
| <b>Geography</b>             | South            | South            | Mid-West                | Mid-East         | North                   |

Procurement type mentioned in the above table is used to refer to the model ~~where in~~ ~~wherein~~ the state drug procurement budget is divided between centralized and decentralized methods of acquiring medicines. Autonomy refers to the extent of government involvement in the decisions of the procurement organization; “fully autonomous” implies minimal involvement while “government owned” indicates a high degree of involvement. The rating of health infrastructure as ‘good’ and ‘poor’ has been based upon the perceived condition of the infrastructure such as the drug warehouses, transportation facilities, ~~CHC/PHC~~ ~~community health center, primary health center~~ and district hospital conditions.

Brief information about the sample states, for an overview of the context, is presented in Exhibit 4.

*Exhibit 4: Overview of Sample States*

| Parameter                           | Kerala     | Maharashtra | Orissa     | Punjab     | Tamil Nadu |
|-------------------------------------|------------|-------------|------------|------------|------------|
| <b>Total Population</b>             | 33,387,677 | 112,372,972 | 41,947,358 | 27,704,236 | 72,138,958 |
| <b>Urban/Rural Population Ratio</b> | 91.3%      | 82.6%       | 20.0%      | 60.0%      | 94.0%      |
| <b>Annual Per capita Income</b>     | 59,179     | 83,471      | 36,923     | 67,473     | 72,993     |

<sup>1</sup> Right to information act: Right to Information Act 2005 mandates timely response to citizen requests for government information

Formatted: Font: Not Bold

|                                                   |        |        |        |        |        |
|---------------------------------------------------|--------|--------|--------|--------|--------|
| Annual Per capita Exp. - Rural                    | 22,020 | 13,836 | 9,816  | 19,788 | 13,920 |
| Annual Per capita Exp. - Urban                    | 28,956 | 29,244 | 18,576 | 25,308 | 23,376 |
| Total Per Capita Health Exp.                      | 2,952  | 1,576  | 995    | 1,813  | 933    |
| Public Component %                                | 10.8%  | 22.1%  | 18.0%  | 18.0%  | 26.6%  |
| Private Component %                               | 86.3%  | 73.3%  | 79.1%  | 76.1%  | 60.7%  |
| Number of Sub-Centers                             | 4,575  | 10,579 | 6,688  | 2,950  | 8,706  |
| Number of <b>PHCs</b> Primary Health Centers      | 697    | 1816   | 1279   | 394    | 1277   |
| Number of <b>CHCs</b> Community Health Centers    | 226    | 376    | 231    | 129    | 256    |
| Number of <b>DHs</b> District Hospitals           | 14     | 35     | 32     | 20     | 29     |
| Birth Rate (/1000 Population)                     | 14.7   | 17.9   | 21.5   | 17.6   | 15.8   |
| Death Rate (/1000 Population)                     | 6.8    | 6.6    | 9.2    | 7      | 7.2    |
| Infant Mortality Rate (/1000 Live Births)         | 13     | 33     | 71     | 43     | 35     |
| Maternal Mortality Rate (Per 100,000 Live Births) | 110    | 130    | 303    | 192    | 111    |
| Total Fertility Rate (Children Per Woman)         | 1.7    | 2      | 2.4    | 2      | 1.6    |

Source: Census 2011; Level and Pattern of Consumer Expenditure 2009-10 NSSO 66<sup>th</sup> round; Bulletin on Rural Health Statistics in India 2008, MoHFW; Sample Registration Survey 2010-11

Primary data for the study was gathered through ~~warehouse audits and~~ key informant analysis, in which semi-structured interviews were conducted with executive leadership teams of the drug procurement cells and public health officials in the sample states in March – April 2012. ~~The secondary resources used are the statistical databases, peer reviewed articles and grey literature, and RTI responses from sample states. The information gathered from the key informant analysis was corroborated with the field staff by way of semi-structured interviews with stakeholders of primary health centers, community health centers, and district hospitals, and qualitative observation during the authors' warehouse visits.~~

Formatted: English (India)

Secondary data on expenditures, budgets and indicators was compiled from datasets published by the National Sample Survey Office, Ministry of Health and Family Welfare (Bulletin on Rural Health Statistics in India), and Office of the Registrar General & Census Commissioner of India (Sample Registration Survey). This study is intended to be a qualitative assessment with an objective of framing questions for future research, therefore no statistical techniques were used.

## Findings & Discussion

The procurement processes followed in the sample states were evaluated against a pre-determined set of 53 parameters (including price). See Exhibit 5 for the list of pre-determined parameters used for comparison.

*Exhibit 5: Overview of Comparison Parameters*

|                                                |                                                                                                                                                                                                                                                                                     |
|------------------------------------------------|-------------------------------------------------------------------------------------------------------------------------------------------------------------------------------------------------------------------------------------------------------------------------------------|
| <b>Overall</b>                                 | <ul style="list-style-type: none"> <li>Legal Status of the Procurement Organization; Drug Procurement Budget; Per Capita Drug Procurement Budget;</li> </ul>                                                                                                                        |
| <b>Essential Drug List</b>                     | <ul style="list-style-type: none"> <li>EDL Customization; EDL Committee Composition; Frequency of EDL Revision; Time for EDL Preparation/ Revision; EDL Categorization; Third Party Review of EDL</li> </ul>                                                                        |
| <b>Demand Estimation &amp; Forecast</b>        | <ul style="list-style-type: none"> <li>Demand Estimation Process; Frequency of Demand Estimation; Methodology for Estimation (Facility Level)</li> </ul>                                                                                                                            |
| <b>Procurement Process</b>                     | <ul style="list-style-type: none"> <li>Procurement mechanism in the state; Financing of Drug Procurement; Emergency Drug Budget Allocation; Bidding Process</li> </ul>                                                                                                              |
| <b>Prequalification Criteria</b>               | <ul style="list-style-type: none"> <li>Min. Turnover Criteria; GMP/WHO-GMP/US-FDA; ISI/BIS/ISO/CE; Assurance of avbl. Production Capacity; Market Standing; Exclusion Criteria; Price Relaxation; Product Reservation; EMD (%); Tenders with no bidders; Supply Schedule</li> </ul> |
| <b>Quality Control</b>                         | <ul style="list-style-type: none"> <li>External Quality Testing Of Every Consignment; Testing Before Distribution; Testing Before Distribution</li> </ul>                                                                                                                           |
| <b>Payment Mechanism</b>                       | <ul style="list-style-type: none"> <li>Payment Department Status; Lead Time For Payment; Prerequisites For Payment Disbursement</li> </ul>                                                                                                                                          |
| <b>Inventory Management &amp; Distribution</b> | <ul style="list-style-type: none"> <li>Facilities Per Warehouse; Scientific Warehousing Practices; Supply Chain Management; Inventory Management; Scientific Forecasting; Flexibility to Alter Indent; Tracking dispatched drugs; Scientific inventory Mgmt. at Facility</li> </ul> |
| <b>Penalties</b>                               | <ul style="list-style-type: none"> <li>Supply Default; Quality Failure; Blacklisting Criteria</li> </ul>                                                                                                                                                                            |
| <b>IT Systems Enablement (of)</b>              | <ul style="list-style-type: none"> <li>Demand Estimation &amp; Forecasting; Tendering Process; Quality Control; Payment Disbursement; Inventory Management (Warehouse); Inventory Management (Facility)</li> </ul>                                                                  |

The detailed comparison tablets ~~are presented in annexures (See annexure 1 for procurement process comparison and annexure 2 for price comparison of 32 selected molecules that appear in same dosages commonly across the sample states) on procurement process and prices are presented in Exhibits 6 and 7.~~ In many instances, the process followed is very different from the one given in the manuals. The information captured below relates to the process that are actually followed.

Formatted: English (India)

Formatted: No Spacing



Exhibit 6: Procurement Process Comparison Across the Sample States

| Parameter                                          | Kerala                                                               | Orissa                                                                     | Tamil Nadu                                  | Punjab                                                        | Maharashtra                                                    |
|----------------------------------------------------|----------------------------------------------------------------------|----------------------------------------------------------------------------|---------------------------------------------|---------------------------------------------------------------|----------------------------------------------------------------|
| <u>Legal Status Of Procurement Organization</u>    | <u>Autonomous (KMSSL)</u>                                            | <u>Government Owned (Part Of DHS)</u>                                      | <u>Autonomous (TNMSC)</u>                   | <u>Government Owned (PHSC)</u>                                | <u>Government Owned</u>                                        |
| <u>Drug Procurement Budget (USD)</u>               | <u>36.3 Million (2011 - 12)</u>                                      | <u>8.1 Million (2010 - 11)</u>                                             | <u>39.8 Million (2010 - 11)</u>             | <u>3.4 Million (0.4 mil. State Budget + 3 mil. User Fees)</u> | <u>87.5 Million (2010-11)</u>                                  |
| <u>Per Capita Drug Procurement Budget</u>          | <u>51</u>                                                            | <u>8.8</u>                                                                 | <u>22.5</u>                                 | <u>5.8</u>                                                    | <u>35.6</u>                                                    |
| <u>Essential Drug List</u>                         |                                                                      |                                                                            |                                             |                                                               |                                                                |
| <u>Customized State EDL</u>                        | <u>Yes</u>                                                           | <u>Yes</u>                                                                 | <u>Yes</u>                                  | <u>Yes</u>                                                    | <u>No, But It Has A Drug List Comprising 1850 Drugs</u>        |
| <u>Composition Of EDL Committee</u>                | <u>Multistakeholder Committee</u>                                    | <u>Multistakeholder Committee</u>                                          | <u>Multistakeholder Committee</u>           | <u>Multistakeholder Committee</u>                             | <u>Multistakeholder Committee</u>                              |
| <u>Frequency Of EDL Revision</u>                   | <u>1 Year</u>                                                        | <u>2 Years</u>                                                             | <u>1 Year</u>                               | <u>1 Year</u>                                                 | <u>N/A</u>                                                     |
| <u>Time For EDL Preparation/ Revision</u>          | <u>2 - 3 Months</u>                                                  | <u>7 - 8 Months</u>                                                        | <u>2 - 3 Months</u>                         | <u>4 Months</u>                                               | <u>N/A</u>                                                     |
| <u>EDL Categorization</u>                          | <u>Yes (8 Product-Based Categories)</u>                              | <u>Yes (2 Demography-Based Lists)</u>                                      | <u>Yes (Product-Based Categories)</u>       | <u>Yes</u>                                                    | <u>N/A</u>                                                     |
| <u>Third Party Review Of EDL</u>                   | <u>No</u>                                                            | <u>Yes (By WHO Experts)</u>                                                | <u>No</u>                                   | <u>No</u>                                                     | <u>N/A</u>                                                     |
| <u>Demand Estimation &amp; Forecast</u>            |                                                                      |                                                                            |                                             |                                                               |                                                                |
| <u>Demand Estimation Process</u>                   | <u>Aggregation Of Facility Indents</u>                               | <u>Aggregation Of Facility Indents</u>                                     | <u>Aggregation Of Facility Indents</u>      | <u>Aggregation Of Facility Indents</u>                        | <u>Facility Level Indenting</u>                                |
| <u>Frequency Of Demand Estimation</u>              | <u>1 Year</u>                                                        | <u>1 Year</u>                                                              | <u>1 Year</u>                               | <u>1 Year</u>                                                 | <u>1 Year</u>                                                  |
| <u>Methodology For Estimation (Facility Level)</u> | <u>10 - 15% Over Previous Year's Indent; Performed By Pharmacist</u> | <u>No Scientific Method; Usually Performed By Computer Operator/ Clerk</u> | <u>10% Of The Previous Year Consumption</u> | <u>N/A</u>                                                    | <u>10% Of Previous Year Consumption</u>                        |
| <u>Procurement Process</u>                         |                                                                      |                                                                            |                                             |                                                               |                                                                |
| <u>Procurement Mechanism In The State</u>          | <u>Centralized</u>                                                   | <u>80% Centralized; 20% Decentralized</u>                                  | <u>90% Centralized; 10% Decentralized</u>   | <u>12.5% Centralized; 87.5% Decentralized</u>                 | <u>Centralized Rate Contracting ; Decentralized Purchasing</u> |
| <u>Financing Of Drug Procurement</u>               | <u>State Budget Allocation</u>                                       | <u>State Budget Allocation</u>                                             | <u>State Budget Allocation</u>              | <u>State Budget Allocation &amp; User Charges</u>             | <u>State Budget Allocation</u>                                 |
| <u>Emergency Drug Budget Allocation</u>            | <u>Yes (Additional Funds Released)</u>                               | <u>No (Purchased From Existing Budget)</u>                                 | <u>Yes (Additional Funds Released)</u>      | <u>No</u>                                                     | <u>Yes (Additional Funds Released)</u>                         |
| <u>Tendering Process</u>                           |                                                                      |                                                                            |                                             |                                                               |                                                                |
| <u>Bidding Process</u>                             | <u>Two Bid System</u>                                                | <u>Two Bid System</u>                                                      | <u>Two Bid System</u>                       | <u>Two Bid System</u>                                         | <u>Two Bid System</u>                                          |

Formatted Table

Formatted: Font: +Body (Cambria), 12 pt

Formatted: Left, Space After: 0 pt

Formatted: Font: +Body (Cambria), 12 pt

Formatted: Left, Space After: 0 pt

Formatted: Font: +Body (Cambria), 12 pt, Not Bold

Formatted: Left, Space After: 0 pt

Formatted: Font: +Body (Cambria), 12 pt, Not Bold

Formatted: Left, Space After: 0 pt

1  
2  
3  
4  
5  
6  
7  
8  
9  
10  
11  
12  
13  
14  
15  
16  
17  
18  
19  
20  
21  
22  
23  
24  
25  
26  
27  
28  
29  
30  
31  
32  
33  
34  
35  
36  
37  
38  
39  
40  
41  
42  
43  
44  
45  
46  
47  
48  
49

|                                                            |                                                                                       |                                                                                  |                                                                      |                                                  |                                                                                  |
|------------------------------------------------------------|---------------------------------------------------------------------------------------|----------------------------------------------------------------------------------|----------------------------------------------------------------------|--------------------------------------------------|----------------------------------------------------------------------------------|
| <b>Prequalification Criteria</b>                           |                                                                                       |                                                                                  |                                                                      |                                                  |                                                                                  |
| Min. Turnover Criteria (INR/USD)                           | <del>10 Crore/ 2.1 Million</del>                                                      | <del>10 Crore/ 2.1 Million</del>                                                 | <del>3 Crore/ 0.7 Million</del>                                      | <del>50 Crore/ 10.7 Million</del>                | <del>10 Crores/ 2.1 Million</del>                                                |
| GMP/ WHO-GMP/ US-FDA                                       | Required                                                                              | Required                                                                         | Required                                                             | Required                                         | WHO-GMP Required                                                                 |
| ISI/ BIS/ ISO/ CE                                          | Required                                                                              | Required                                                                         | N/A                                                                  | N/A                                              | N/A                                                                              |
| Assurance Of Available Production Capacity                 | Required (MPMASS)                                                                     | None                                                                             | Production Capacity Certificate                                      | N/A                                              | Production Capacity Certificate                                                  |
| Market Standing                                            | 2 Years                                                                               | 3 Years                                                                          | 3 Years                                                              | 3 Years                                          | 3 Years                                                                          |
| Exclusion Criteria For Factory Inspections                 | Supply To Premier Institutions                                                        | None                                                                             | None                                                                 | None                                             | N/A                                                                              |
| Price Relaxation For SSIs/ PSUs                            | Yes (SSI - 10%; PSU - 15%)                                                            | Yes (SSI - 10%; Additional 3% For ISO Certification)                             | Yes (SSI - 15%)                                                      | PSU produced Antibiotics                         | None (20% Quantity Reserved If SSI Matches L1 Rate)                              |
| Product Reservation For SSIs/ PSUs                         | None                                                                                  | 31 Items (From SSIs)                                                             | None                                                                 | None                                             | None                                                                             |
| EMD                                                        | 1% Of Tender Value                                                                    | 1 - 5% Of Tender Value                                                           | 1% of Tender value (maximum upto 50,000 INR), expempted for SSI      | Differs For Each Drug                            | INR 25,000                                                                       |
| Process For Tenders With No Bidders (In Order Of Priority) | Re-Tender (Revised Pre-Qualifications); Limited Tender; Short Tender; Direct Purchase | Re-Tender (Same Pre-Qualifications) - Open Until Bids Are Received               | Re-tender (Limited and Short tender process is used)                 | Pharmacy Based Purchasing                        | Re-Tendering, Limited Tendering Or Direct Purchase                               |
| Supply Schedule                                            | 60 Days - 40% Of PO Quantity; 90 Days - 70%; 120 Days - 100%                          | 60 Days - 50% Of PO Quantity; Rest Before Specified Date                         | Starting from 30 days and has to end by 60 days, otherwise specified | 30 days to 3 months from the time of issue of PO | Within 3 Months From The Issue Of PO                                             |
| <b>Quality Control</b>                                     |                                                                                       |                                                                                  |                                                                      |                                                  |                                                                                  |
| External Quality Testing Of Every Consignment              | <del>Empanelled Private Labs</del>                                                    | <del>No External Quality Testing (Supplier's Internal Quality Certificate)</del> | <del>Empanelled Private and government labs</del>                    | <del>Empanelled Government Labs</del>            | <del>No External Quality Testing (Supplier's Internal Quality Certificate)</del> |
| Testing Before Distribution                                | Mandatory                                                                             | Not Mandatory                                                                    | Mandatory                                                            | Mandatory                                        | Not Mandatory                                                                    |
| Lead Time For Quality Testing                              | ~ 15 Days                                                                             | Within 8 Weeks                                                                   | 15 Days For Tablets And Capsules; 1 Month For Suspensions            | 1 Month                                          | N/A                                                                              |
| <b>Payment Mechanism</b>                                   |                                                                                       |                                                                                  |                                                                      |                                                  |                                                                                  |
| Payment Department Status                                  | <del>Autonomous (Managed By Contractual Staff)</del>                                  | <del>Government (Account General's Office)</del>                                 | <del>Autonomous (Managed By Contractual Staff)-IT enabled</del>      | <del>Government</del>                            | <del>Government (Directorate Of Accounts And Treasuries)</del>                   |

Formatted: Font: +Body (Cambria), 12 pt

Formatted: Left, Space After: 0 pt

Formatted: Font: +Body (Cambria), 12 pt, Not Bold

Formatted: Left, Space After: 0 pt

Formatted: Font: +Body (Cambria), 12 pt, Not Bold

Formatted: Left, Space After: 0 pt

1  
2  
3  
4  
5  
6  
7  
8  
9  
10  
11  
12  
13  
14  
15  
16  
17  
18  
19  
20  
21  
22  
23  
24  
25  
26  
27  
28  
29  
30  
31  
32  
33  
34  
35  
36  
37  
38  
39  
40  
41  
42  
43  
44  
45  
46  
47  
48  
49

|                                                            |                                                                                                                         |                                                                              |                                                                 |                                                                   |                                                                                                                                      |
|------------------------------------------------------------|-------------------------------------------------------------------------------------------------------------------------|------------------------------------------------------------------------------|-----------------------------------------------------------------|-------------------------------------------------------------------|--------------------------------------------------------------------------------------------------------------------------------------|
| <u>Lead Time For Payment</u>                               | <u>~ 30 Days</u>                                                                                                        | <u>~90 Days</u>                                                              | <u>30 Days</u>                                                  | <u>Min.. 30 Days</u>                                              | <u>~ 90 Days</u>                                                                                                                     |
| <u>Prerequisites For Payment Disbursement</u>              | <u>Warehouse Material Receipt, External Quality Certificate</u>                                                         | <u>Warehouse Material Receipt, Supplier's Internal Quality Certificate</u>   | <u>Warehouse Material Receipt, External Quality Certificate</u> | <u>Warehouse Material Receipt, Quality Certificates From Labs</u> | <u>Facility Material Receipt, Internal Quality Certificate</u>                                                                       |
| <u>Inventory Mgmt. &amp; Distribution</u>                  |                                                                                                                         |                                                                              |                                                                 |                                                                   |                                                                                                                                      |
| <u>Facilities (All) Catered To Per Warehouse (Average)</u> | <u>~290</u>                                                                                                             | <u>~235</u>                                                                  | <u>~411</u>                                                     | <u>N/A</u>                                                        | <u>N/A</u>                                                                                                                           |
| <u>Scientific Warehousing Practices</u>                    | <u>Yes</u>                                                                                                              | <u>No</u>                                                                    | <u>Yes</u>                                                      | <u>No</u>                                                         | <u>No</u>                                                                                                                            |
| <u>In-House/ Outsourced Supply Chain Management</u>        | <u>Outsourced</u>                                                                                                       | <u>In-House</u>                                                              | <u>In-House</u>                                                 | <u>In-House</u>                                                   | <u>In-House (Facility Level)</u>                                                                                                     |
| <u>Inventory Management</u>                                | <u>Dynamic (Flexibility Of 2nd PO)</u>                                                                                  | <u>Static (Only Single PO Is Issued)</u>                                     | <u>Dynamic (Flexibility Of 2nd PO)</u>                          | <u>Static</u>                                                     | <u>25% Flexibility For Quantity Maintained</u>                                                                                       |
| <u>Scientific Consumption/ Inventory Forecasting</u>       | <u>Yes (Inventory Management Software)</u>                                                                              | <u>No</u>                                                                    | <u>Yes (Inventory Management Software)</u>                      | <u>No</u>                                                         | <u>No</u>                                                                                                                            |
| <u>Flexibility For Facilities To Alter Indent</u>          | <u>Yes (Just Before Dispatch)</u>                                                                                       | <u>No</u>                                                                    | <u>Yes</u>                                                      | <u>Yes</u>                                                        | <u>No</u>                                                                                                                            |
| <u>Tracking Dispatched/ Delivered Drugs</u>                | <u>Currently Passbook (Volume Based; Online In Future)</u>                                                              | <u>No Tracking</u>                                                           | <u>Passbook (Value Based)</u>                                   | <u>N/A</u>                                                        | <u>No</u>                                                                                                                            |
| <u>(Scientific) Inventory Management At Facility</u>       | <u>No (Online In Future)</u>                                                                                            | <u>No</u>                                                                    | <u>Use First in First Out (FIFO) principle</u>                  | <u>No</u>                                                         | <u>No</u>                                                                                                                            |
| <u>Penalty</u>                                             |                                                                                                                         |                                                                              |                                                                 |                                                                   |                                                                                                                                      |
| <u>Penalty For Supply Schedule Default</u>                 | <u>10% Of The Unexecuted Supply; Unexecuted Supply Purchased At The Cost Of Supplier In Case Of Inability To Supply</u> | <u>N/A</u>                                                                   | <u>0.5% per day to maximum of 15% of the tender amount</u>      | <u>N/A</u>                                                        | <u>0.5% Of The Value Of Unsupplied Goods Per Week Up To 5 Weeks, After Which Unexecuted Supply Purchased At The Cost Of Supplier</u> |
| <u>Penalty For Quality Failure</u>                         | <u>Supplier Blacklisted With Forfeiture Of Security Deposit</u>                                                         | <u>Suppliers Have To Replace The Entire PO Quantity Or Risk Blacklisting</u> | <u>Supplier Blacklisted With Forfeiture Of Security Deposit</u> | <u>Forfeiture Of EMD</u>                                          | <u>Supplier Blacklisted With Forfeiture Of Security Deposit</u>                                                                      |

Formatted: Font: +Body (Cambria), 12 pt  
Formatted: Left, Space After: 0 pt

Formatted: Font: +Body (Cambria), 12 pt, Not Bold  
Formatted: Left, Space After: 0 pt

1  
2  
3  
4  
5  
6  
7  
8  
9  
10  
11  
12  
13  
14  
15  
16  
17  
18  
19  
20  
21  
22  
23  
24  
25  
26  
27  
28  
29  
30  
31  
32  
33  
34  
35  
36  
37  
38  
39  
40  
41  
42  
43  
44  
45  
46  
47  
48  
49

| <u>Blacklisting Criteria</u>               | <u>Defaulting On 3 POs Or More With Less Than 50% Supply; Blacklisted By Any Other Procurement Agency On Quality Grounds</u> | <u>Quality Failure After Material Supply</u> | <u>Defaulting Continuously on 3 POs With Less Than 50% Supply, Quality Failure, Blacklisted By National Or Other State Level Agencies</u> | <u>Defaulting Continuously on 3 POs With Less Than 50% Supply, Quality Failure, Blacklisted By National Or Other State Level Agencies</u> | <u>Supply Default After Extension Period; Quality Failure</u> |
|--------------------------------------------|------------------------------------------------------------------------------------------------------------------------------|----------------------------------------------|-------------------------------------------------------------------------------------------------------------------------------------------|-------------------------------------------------------------------------------------------------------------------------------------------|---------------------------------------------------------------|
| <b>IT Enablement Processes:</b>            |                                                                                                                              |                                              |                                                                                                                                           |                                                                                                                                           |                                                               |
| <u>Demand Estimation &amp; Forecasting</u> | <u>Yes</u>                                                                                                                   | <u>No</u>                                    | <u>Yes</u>                                                                                                                                | <u>No</u>                                                                                                                                 | <u>No</u>                                                     |
| <u>Tendering Process</u>                   | <u>Yes</u>                                                                                                                   | <u>No</u>                                    | <u>Yes</u>                                                                                                                                | <u>No</u>                                                                                                                                 | <u>Yes</u>                                                    |
| <u>Quality Control</u>                     |                                                                                                                              | <u>No</u>                                    | <u>Yes</u>                                                                                                                                | <u>No</u>                                                                                                                                 | <u>No</u>                                                     |
| <u>Payment Disbursement</u>                | <u>Yes</u>                                                                                                                   | <u>No</u>                                    | <u>Yes</u>                                                                                                                                | <u>No</u>                                                                                                                                 | <u>No</u>                                                     |
| <u>Inventory Management (Warehouse)</u>    | <u>Yes</u>                                                                                                                   | <u>Yes</u>                                   | <u>Yes</u>                                                                                                                                | <u>No</u>                                                                                                                                 | <u>No</u>                                                     |
| <u>Inventory Management (Facility)</u>     | <u>No</u>                                                                                                                    | <u>No</u>                                    | <u>Yes</u>                                                                                                                                | <u>No</u>                                                                                                                                 | <u>No</u>                                                     |

Formatted: Font: +Body (Cambria), 12 pt  
Formatted: Left, Space After: 0 pt  
Formatted: Font: +Body (Cambria), 12 pt  
Formatted: Left, Space After: 0 pt

*Exhibit 7: Price Comparison of 32 Randomly Selected Drugs Across the Sample States*

| <u>Name of Drug</u>      | <u>Dosage</u>              | <u>Unit</u>    | <u>Price (INR)</u> |                        |                    |                         |                    |
|--------------------------|----------------------------|----------------|--------------------|------------------------|--------------------|-------------------------|--------------------|
|                          |                            |                | <u>Kerala 2012</u> | <u>Tamil Nadu 2012</u> | <u>Odisha 2009</u> | <u>Maharashtra 2011</u> | <u>Punjab 2010</u> |
| <u>Adrenaline</u>        | <u>1mg/1 ml</u>            | <u>Ampoule</u> | <u>2.89</u>        | <u>1.21</u>            | <u>1.46</u>        | <u>1.80</u>             | <u>n/a</u>         |
| <u>Albendazole</u>       | <u>400 mg</u>              | <u>Tablet</u>  | <u>0.81</u>        | <u>0.57</u>            | <u>0.49</u>        | <u>0.61</u>             | <u>0.64</u>        |
| <u>Aminophylline</u>     | <u>25 mg/ml</u>            | <u>Ampoule</u> | <u>n/a</u>         | <u>2.60</u>            | <u>2.91</u>        | <u>4.90</u>             | <u>n/a</u>         |
| <u>Amitriptyline</u>     | <u>25 mg</u>               | <u>Tablet</u>  | <u>0.22</u>        | <u>0.15</u>            | <u>0.15</u>        | <u>0.19</u>             | <u>n/a</u>         |
| <u>Amlodipine</u>        | <u>5 mg</u>                | <u>Tablet</u>  | <u>0.16</u>        | <u>0.06</u>            | <u>0.09</u>        | <u>0.10</u>             | <u>0.13</u>        |
| <u>Atenolol</u>          | <u>50 mg</u>               | <u>Tablet</u>  | <u>0.125</u>       | <u>0.11</u>            | <u>0.13</u>        | <u>0.14</u>             | <u>0.14</u>        |
| <u>Benzyl Penicillin</u> | <u>10 Lakh IU</u>          | <u>Vial</u>    | <u>3.68</u>        | <u>3.08</u>            | <u>4.20</u>        | <u>4.88</u>             | <u>n/a</u>         |
| <u>Carbamazepine</u>     | <u>200 mg</u>              | <u>Tablet</u>  | <u>0.59</u>        | <u>0.54</u>            | <u>0.42</u>        | <u>0.53</u>             | <u>n/a</u>         |
| <u>Cefotaxime</u>        | <u>250 mg</u>              | <u>Vial</u>    | <u>4.73</u>        | <u>3.94</u>            | <u>5.40</u>        | <u>5.14</u>             | <u>n/a</u>         |
| <u>Ciprofloxacin</u>     | <u>500 mg</u>              | <u>Tablet</u>  | <u>1.09</u>        | <u>1.04</u>            | <u>0.87</u>        | <u>1.07</u>             | <u>1.86</u>        |
| <u>Co-trimoxazole</u>    | <u>40mg+ 200mg per 5ml</u> | <u>Bottle</u>  | <u>n/a</u>         | <u>5.91</u>            | <u>5.90</u>        | <u>6.74</u>             | <u>n/a</u>         |
| <u>Diclofenac</u>        | <u>25 mg/ml</u>            | <u>Ampoule</u> | <u>1.33</u>        | <u>1.08</u>            | <u>1.04</u>        | <u>1.40</u>             | <u>2.70</u>        |
| <u>Dicyclomine</u>       | <u>10 mg/ml</u>            | <u>Ampoule</u> | <u>1.34</u>        | <u>0.88</u>            | <u>1.17</u>        | <u>1.37</u>             | <u>n/a</u>         |

|                                   |                  |                |             |              |              |              |             |
|-----------------------------------|------------------|----------------|-------------|--------------|--------------|--------------|-------------|
| <u>Dopamine</u>                   | <u>40 mg/ml</u>  | <u>Vial</u>    | <u>6.4</u>  | <u>5.40</u>  | <u>5.53</u>  | <u>7.87</u>  | <u>n/a</u>  |
| <u>Erythromycin</u>               | <u>250 mg</u>    | <u>Tablet</u>  | <u>1.27</u> | <u>1.23</u>  | <u>0.81</u>  | <u>1.03</u>  | <u>n/a</u>  |
| <u>Folic Acid</u>                 | <u>5 mg</u>      | <u>Tablet</u>  | <u>0.06</u> | <u>0.06</u>  | <u>0.06</u>  | <u>0.08</u>  | <u>0.05</u> |
| <u>Gamma Benzene Hexachloride</u> | <u>1% w/v</u>    | <u>Bottle</u>  | <u>12.5</u> | <u>9.63</u>  | <u>12.77</u> | <u>10.18</u> | <u>n/a</u>  |
| <u>Glibenclamide</u>              | <u>5 mg</u>      | <u>Tablet</u>  | <u>0.12</u> | <u>0.07</u>  | <u>0.08</u>  | <u>0.08</u>  | <u>n/a</u>  |
| <u>Glycopyrrolate</u>             | <u>0.2 mg/ml</u> | <u>Ampoule</u> | <u>5.22</u> | <u>1.65</u>  | <u>3.25</u>  | <u>3.51</u>  | <u>n/a</u>  |
| <u>Hydrocortisone</u>             | <u>100 mg</u>    | <u>Vial</u>    | <u>11</u>   | <u>10.50</u> | <u>7.45</u>  | <u>11.38</u> | <u>7.39</u> |
| <u>Ketamine</u>                   | <u>50 mg/ml</u>  | <u>Vial</u>    | <u>n/a</u>  | <u>16.27</u> | <u>14.60</u> | <u>17.10</u> | <u>n/a</u>  |
| <u>Lignocaine</u>                 | <u>2% w/v</u>    | <u>Vial</u>    | <u>7.75</u> | <u>4.54</u>  | <u>3.80</u>  | <u>6.30</u>  | <u>4.40</u> |
| <u>Metformin</u>                  | <u>500 mg</u>    | <u>Tablet</u>  | <u>0.24</u> | <u>0.19</u>  | <u>0.18</u>  | <u>0.19</u>  | <u>n/a</u>  |
| <u>Methyl Ergometrine</u>         | <u>0.2 mg/ml</u> | <u>Ampoule</u> | <u>1.85</u> | <u>1.33</u>  | <u>1.71</u>  | <u>2.75</u>  | <u>n/a</u>  |
| <u>Norfloxacin</u>                | <u>400 mg</u>    | <u>Tablet</u>  | <u>0.78</u> | <u>0.79</u>  | <u>0.57</u>  | <u>0.76</u>  | <u>n/a</u>  |
| <u>Oxytocin</u>                   | <u>5 IU/ml</u>   | <u>Ampoule</u> | <u>n/a</u>  | <u>1.16</u>  | <u>1.65</u>  | <u>1.51</u>  | <u>n/a</u>  |
| <u>Pentazocine</u>                | <u>30 mg/ml</u>  | <u>Ampoule</u> | <u>3.05</u> | <u>2.41</u>  | <u>2.58</u>  | <u>3.51</u>  | <u>3.60</u> |
| <u>Phenobarbitone</u>             | <u>30 mg</u>     | <u>Tablet</u>  | <u>0.28</u> | <u>0.09</u>  | <u>0.12</u>  | <u>1.43</u>  | <u>0.11</u> |
| <u>Phenytoin</u>                  | <u>100 mg</u>    | <u>Tablet</u>  | <u>0.36</u> | <u>0.16</u>  | <u>0.11</u>  | <u>1.60</u>  | <u>n/a</u>  |
| <u>Promethazine</u>               | <u>25 mg</u>     | <u>Ampoule</u> | <u>1.68</u> | <u>1.19</u>  | <u>1.10</u>  | <u>1.60</u>  | <u>n/a</u>  |
| <u>Ranitidine</u>                 | <u>50 mg</u>     | <u>Ampoule</u> | <u>1.31</u> | <u>0.81</u>  | <u>0.98</u>  | <u>1.40</u>  | <u>2.20</u> |
| <u>Thiopentone</u>                | <u>500 mg</u>    | <u>Ampoule</u> | <u>21.5</u> | <u>16.60</u> | <u>17.20</u> | <u>11.85</u> | <u>n/a</u>  |

## Discussion

An efficient drug distribution system ensures the **right medicines** in **sufficient quantities** procured at **lowest prices** to secure the **maximum therapeutic value** to the **largest number of beneficiaries** with the **available & additional resources**.

Broadly speaking, the two main beneficiaries in this context are the government and the patient. On one hand, rationality dictates that any government in a resource-constrained setting would expect that an effective procurement system would ensure availability of quality medicines while optimizing the finances to ensure best outcomes. It is also in the interest of the government to run this system transparently to promote competition and thus efficiency. On the other hand, a patient expects that good quality medicines are available at all time, free of cost. (See Exhibit 68 for an expectation map of both beneficiaries). Leadership, technical capability and information technology overarching the expectations in the exhibit below are the pre-requisites for running a system efficiently. The capability of each states' procurement system to enhance IT usage and administrative capabilities driven by a strong leader is pre-requisite.

Exhibit 68: Combined Expectation Mapping of Beneficiaries of a Public Procurement System

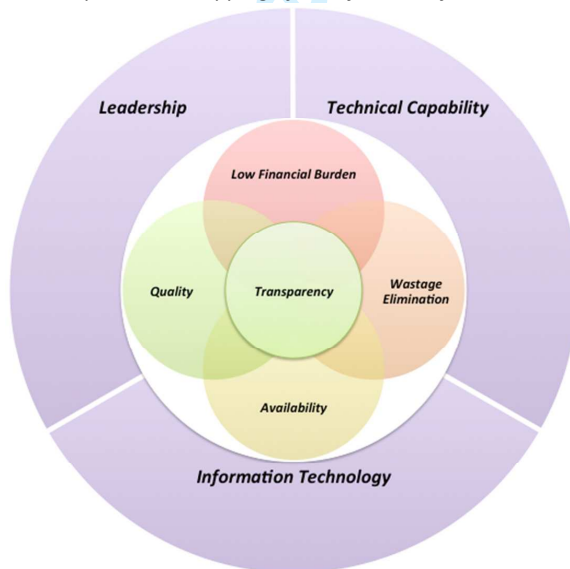

### Low Financial Burden

Low financial burden to the government ex-chequer is an important aspect of the public drug procurement systems because of limited resources. Some of the parameters amongst the 53 comparatives that reflect a procurement system's capacity to reduce financial burden are the extent of capital expenditure for establishing the systems, costs for procurement, storage and transportation, the preciseness of the Essential Drug List (EDL) to suit the state health burden and finally the prices at which drugs are procured.

The procurement process adopted bears some strong repercussions on the budgets, which include both the capital expenditures and operating expenditure to run the system. For completely/predominantly centralized pooled procurement models like Tamil Nadu, Kerala and Odisha it is imperative to have an optimum number of warehouses to cater to all the public health facilities.

1  
2  
3  
4  
5  
6  
7 Additionally, the system requires adequate transportation facilities to transfer supplies from  
8 warehouses to user institutions and IT enablement to manage the entire system necessitating a  
9 considerable initial capital expenditure. With a budget of INR 39.8 Million USD and USD 36.3 Million  
10 in FY2010 for Tamil Nadu and Kerala respectively, the states have been able to make capital  
11 investments – this also includes the cash surplus generated through management fees the  
12 autonomous procurement agencies charge. Kerala has about 19 warehouses while Tamil Nadu about  
13 25, most of which comply with scientific standards of inventory management. Odisha, with a budget  
14 of INR USD 8.1 Million for FY2011, is unable to make the necessary investments to fully realize the  
15 benefits of centralized pooled procurement.

16 Maharashtra follows the system of centralized rate contracting and decentralized purchasing where  
17 the suppliers directly deliver the medicines to the facilities. While transportation costs are not borne  
18 by the state, its cost is built into the drug price. This system also requires significantly large storage  
19 facilities at each user institution thereby increasing the overall cost. Punjab was not considered into  
20 this analysis because it follows a mixed system with drugs worth about USD 0.4 Million being  
21 purchased in a centralized manner while user charges collected by district hospitals accounting for  
22 USD 3 Million are utilized to directly purchase drugs from the open market.

23 A well-formulated and localized EDL is imperative to make optimal use of the limited financial  
24 resources. Tamil Nadu, Kerala and Odisha purchase about 260 drugs each year as a part of EDL while  
25 in Maharashtra centralized rate contracting (decentralized purchasing) is done for about 1,850 drugs.  
26 Though the decentralized purchasing model offers more flexibility for facilities, the administrative  
27 costs of finalizing rate contracts for 1,850 drugs and empanelling the suppliers is by no measure  
28 insignificant.

29 Finally – drug price: the largest expenditure component. Theoretically, centralized procurement  
30 offers volume discounts thereby reducing the financial burden; however Annexure 2 comparing  
31 prices of 32 drugs across the five states reveals that Tamil Nadu may not necessarily have the lowest  
32 price despite greater quantities. Despite the bulk discounts, some drugs are cheaper in states with  
33 arguably inefficient centralized/ predominantly centralized models like Odisha and Punjab and states  
34 with decentralized models like Maharashtra. Due to larger population, public preference towards  
35 the government's health system and good health infrastructure, it is safe to assume that the  
36 quantities for procurement in Tamil Nadu would be significantly higher than Odisha, Kerala or  
37 Punjab. Then the question that remains unanswered is how are the other states able to procure at  
38 prices lower than Tamil Nadu? The reasons could be many. For instance, supplier location – more  
39 than half of the suppliers to Tamil Nadu are from within the state. The same statistic for Kerala is  
40 14%, Maharashtra 34% and for Odisha, a surprising zero percent! With insufficient data, we are  
41 unable to confidently conclude the financial burden of all the variants of the procurement models.  
42 But perhaps this is a good lead to think about what is causing unexpected discrepancies in prices?

#### 43 **Wastage Elimination**

44 Eliminating wastage of drugs (through mishandling or expiry) is necessary (but not sufficient) to  
45 optimize expenditure and ensure availability. Eliminating wastage is predicated upon effective  
46 inventory management, which deals with requirement gathering, analyzing consumption patterns  
47 and forecasting demand. Trained pharmacists using weekly, quarterly and annual consumption data  
48 are supposed to do the demand estimation each year. However in reality, the previous year's data is  
49 inflated by 10 – 15% in most states. In Odisha, however, owing to the lack of trained personnel,  
50 clerks/ computer operators perform these tasks.

51  
52 Kerala was able to mitigate this inaccuracy in estimation by introducing the option of issuing a  
53 second purchase order (PO). The initial PO given to the supplier is only for 75% of the tender  
54



1  
2  
3  
4  
5  
6  
7 quantity. The procurement authorities have the privilege of either not issuing the second PO or  
8 issuing the second PO for 25% or 50% of the tender quantity thereby building in a flexibility of 25%.  
9 All other states have a rather static inventory management.

10 Furthermore, Kerala and Tamil Nadu use software tools to monitor stock levels and manage  
11 inventory and distribution. The warehouses in Punjab, Odisha and Maharashtra manually manage  
12 the inventory by recording data into ledgers. These systems are not designed to store all types of  
13 drugs in a scientific manner. These practices not only lead to wastage of material but also precious  
14 warehouse space (in case of over-supply).

### 15 **Availability**

16 In the centralized model of pooled procurement, the distribution is managed centrally and the onus  
17 of the procurement agency is to ensure availability at the user institutions. The public health centers  
18 in Punjab and Maharashtra are at the mercy of the suppliers, owing to their decentralized  
19 purchasing model, whose supply is often sporadic due to various reasons like delayed payments, lack  
20 of proper planning etc. This impacts availability at the time of need and could potentially lead to  
21 wastage.

### 22 **Quality**

23 A procurement organization has two levers to ensure that only quality drugs enter the system: a)  
24 Pre-qualification criteria to filter out unqualified suppliers b) External quality testing protocols.  
25 When these levers are used together, quality is ensured while still keeping the prices low. States that  
26 have stringent external quality testing protocols can afford to keep the minimum turnover criterion  
27 low. For instance, Tamil Nadu has empanelled laboratories to which every sample from each batch is  
28 sent for quality testing before distributing to user institutions and the minimum turnover criteria  
29 is set at USD 0.7 Million (INR 3 Crores). Kerala too has similar quality testing protocols but has a higher  
30 minimum turnover criteria (set at USD 2.1 Million/ INR 10 crores) to enforce faith into the public  
31 system. Odisha and Maharashtra do not have any quality testing protocols in place, apart from the  
32 supplier's internal quality certificate, and have therefore set the minimum turnover criterion at INR  
33 10 crores, assuming that higher volumes are more likely to be generated by suppliers with high  
34 quality products.

35 Additionally, states that have external quality testing protocols also have policies that provide price  
36 relaxation to Small Scale Industries (SSIs) and Public Sector Undertakings (PSUs) to encourage local  
37 industry. Such preference treatment doesn't exist in Odisha or Punjab. Maharashtra reserves 20% of  
38 quantities to SSIs only if they match the L1 rates and thus do not get any price preferences.

39 An important aspect of the pre-qualification criteria is also the GMP (good manufacturing practices)  
40 certificate. This certificate ensures that the facility follows the stipulated guidelines according to the  
41 industrial benchmarks and thus can ascertain a certain level of quality. Maharashtra demands a  
42 WHO-GMP certificate which is deemed to be more strict and reviewed every two years.

### 43 **Transparency**

44 A public procurement system is accountable to various stakeholders and it is important that  
45 transparency is maintained in all its activities. Certain conditions need to be established for a more  
46 open and efficient functioning. TNMSC and KMSCL are autonomous organisations that are headed  
47 by an appointed Director who maybe a civil services officer with a very good technical and  
48 administrative background. The idea of having an autonomous organisation in the public sector may  
49 enable it to function more transparently by avoiding the plausible procedural delays and also to be  
50 able to make decisions of contracting and outsourcing as best suited for the prosperity of the  
51 organisation. On the other hand, Odisha, Punjab and Maharashtra have procurement cells that are a  
52 part of the Directorate of Health Services (DHS) in the state. A clear difference in the efficiency of  
53

1  
2  
3  
4  
5  
6  
7 the processes can be seen between the autonomous organisations and the state run organisations –  
8 In terms of lead times for payments, quality control and in the usage of IT systems and so on. In an  
9 autonomous system, most of the staff are contractual based on their technical capabilities which  
10 may not be the case in state run procurement organizations.

11 A multistakeholdership in the organisation may be useful tool for bringing in more transparency and  
12 representation provided it is well coordinated. Right from the formation of the essential drugs list  
13 (EDL) to the award of the tenders, open and multi-stakeholder decision making may help keep the  
14 system become more transparent. All the states under the purview of the study have a multi-  
15 stakeholder decision making body.

16  
17 It is deemed to be a good practice to have a separate payment processing team from the tender  
18 award team in order to keep transactions more transparent. All the states issue the payment based  
19 on the receipt of stock in the warehouse and a quality certificate (either internal or external). The  
20 processing of payments through the public channels like (Auditor General's Office or Directorate of  
21 Accounts & Treasury) usually takes much longer, as noted in Maharashtra, Odisha and Punjab  
22 compared to the autonomous payment departments of TNMSC and KMSCL.

## 23 24 Conclusion

25 In conclusion, we opine that the critical success factors of each model need to be carefully analyzed  
26 to see if they are valid in the state contexts. It is important for policy makers to understand in detail  
27 the tangible and intangible aspects that go into running a successful model before trying to replicate  
28 it. Also, in some states the existing structures may be serving the purpose but there maybe a need to  
29 do and undo several aspects of the current method of procurement, to make it more efficient.  
30 Sometimes, scrapping existing structures for new procedures may be a herculean task, which needs  
31 to be well thought out before undertaking. Based on the qualitative observations made, the authors  
32 assert that some of the critical success factors that define the success of any procurement system  
33 are: effective leadership and political support; multi-stakeholder participation for political buy-in;  
34 sufficient budget allocation to meet drug demand and administrative costs; outsourcing of non-core  
35 services like IT, quality testing, supply chain management etc.; autonomy procurement agency, well  
36 defined & localized EDL; scientific demand estimation and forecasting; effective pre-qualification  
37 criteria to promote competition and enforce quality; protocols for regular inspection of supplier  
38 premises; mandatory external quality testing; prompt payment to suppliers; autonomous payment  
39 body; scientific warehousing & inventory management; real time stock monitority (both at warehouse  
40 and facility level); and robust IT systems.

## 41 42 43 Limitations of the study

44 Despite an effort to draw inferences from various primary and secondary sources, the study has  
45 some limitations that are mentioned below:

- 46 • Availability of essential medicines at the public health facilities was not assessed a a part of  
47 this study. It is the primary indicator of efficacy of a procurement system so all the  
48 qualitative findings mentioned in the paper will have to recognize the lack of this data and  
49 interpret the findings appropriately
- 50 • Time and resource constraints have limited our primary data to ~~one of~~ two districts in each  
51 State. However, efforts were made to include both urban and rural ones in the study
- 52 • Quantifying the 'impact' of each of the procurement systems is rather ambiguous due to the  
53 lack of concrete indicators to record aspects like corruption, governance and so on. Thus,  
54

1  
2  
3  
4  
5  
6  
7 this section is qualitatively recorded with the help of a few indicators composed based on  
8 existing literature and some aspects specific to public procurement systems  
9

## 10 Works Cited

11 Cameron, A., Ewen, M., Ross-Degnan, D., Ball, D., & Laing, R. (2009). Medicines prices, availability  
12 and affordability in 36 developing and middle-income countries: a secondary analysis. *Lancet* , 240-  
13 249.

14  
15 CDSCO. (2009). *Report on Country-Wide Survey of Spurious Drugs*. New-Delhi: CDSCO, MoHFW.

16  
17 Khan, A., & Ghilzai, N. (2007). Counterfeit and Substandard Quality of drugs: The need for an  
18 effective and stringent regulatory control in India and other developing countries. *Indian J*  
19 *Pharmacol* , 206-207.

20  
21 Kotwani, A., Ewen, M., Dey, D., Iyer, S., Lakshmi, P., Patel, A., et al. (2007). Prices and availability of  
22 common medicines at six sites in India using standard methodology. *Indian Journal of Med Res* , 645-  
23 654.

24  
25 Narayanan, D. (2010 йил 27-July). Tamil Nadu Medical Services Corporation: A Success Story. *Forbes*  
26 *India* .

27  
28 Patel, V., Vaidya, R., Naik, D., & Borker, P. (2005). Irrational Drug Use in India: A Prescription Survey  
29 from Goa. *Journal of Postgraduate medicine* , 9-12.

30  
31 Russell, S. (2004). The Economic Burden of Illness for Households in Developing Countries: A Review  
32 of Studies Focussing on Malaria, Tuberculosis and Human Immunodeficiency Virus / Acquired  
33 Immunodeficiency Syndrome. *American Journal of Tropical Medicine and Hygiene* , 147-155.

34  
35 Selveraj, S., & Karan, A. (2009). Deepening Health Insecurity in India: Evidence from National Sample  
36 Surveys Since 1980's. *Economic and Political Weekly* , 55-60.

37  
38 Selveraj, S., & Nabar, V. (2010). Access to medicines in India: Issues, Challenges and Response. In A.  
39 Mahal, B. Debroy, & L. Ihandri, *India Health Report 2010*. New Delhi.

40  
41 TNMSC. (2010 йил 15-July). Retrieved 2012 йил 28-March from TNMSC News Bulletin:  
42 <http://www.tnmsc.com/tnmsc/publication/July2010.pdf>

43  
44 UNDG. (2003). *Indicators for Monitoring the Millennium Development Goals*. New York: United  
45 Nations.

46  
47 USAID. (2006). *Procurement Strategies for Health Commodities*. Arlington: DELIVER.

48  
49 WHO. (2004). *The World Medicines Situation*. WHO. WHO.

50  
51 Yadav, P., Stapleton, O., & Wassenhove, L. N. (2011). *Always Cola, Rarely Essential Medicines:*  
52 *Comparing Medicine and Consumer Product Supply Chain in the Developing World*. INSEAD.

## 53 Authors' Contributions

- 54 • Prabal Vikram Singh: Involved in the conceptualization and study design, and analysis of  
55 findings.

- Anand Tatambhotla: Involved in the conceptualization and study design, field data collection and analysis of findings.
- Rohini Kalvakuntla: Involved in the conceptualization and study design, field data collection and analysis of findings.
- Maulik Chokshi: Involved in the conceptualization and study design, and analysis of findings.

Formatted: Font: Calibri

For peer review only

**Annexure 1**

| Parameter                                                           | Kerala                                                                                | Goa                                                                 | Tamil Nadu                                                     | Andhra Pradesh                                         | West Bengal                                        |
|---------------------------------------------------------------------|---------------------------------------------------------------------------------------|---------------------------------------------------------------------|----------------------------------------------------------------|--------------------------------------------------------|----------------------------------------------------|
| <b>Legal Status Of Procurement Organization</b>                     | Autonomous (KMSSCL)                                                                   | Government Owned (Part Of DHS)                                      | Autonomous (TNMSSC)                                            | Government Owned (PHSC)                                | Government Owned                                   |
| <b>Drug Procurement Budget (USD)</b>                                | 36.3 Million (2011-12)                                                                | 8.1 Million (2010-11)                                               | 39.8 Million (2010-11)                                         | 3.4 Million (0.4 mil. State Budget + 3 mil. User Fees) | 87.5 Million (2010-11)                             |
| <b>Per Capita Drug Procurement Budget</b>                           | 54                                                                                    | 8.8                                                                 | 22.5                                                           | 5.8                                                    | 35.6                                               |
| <b>Essential Drug List</b>                                          |                                                                                       |                                                                     |                                                                |                                                        |                                                    |
| <b>Customized State EDL</b>                                         | Yes                                                                                   | Yes                                                                 | Yes                                                            | Yes                                                    | Yes                                                |
| <b>Composition Of EDL Committee</b>                                 | Multistakeholder Committee                                                            | Multistakeholder Committee                                          | Multistakeholder Committee                                     | Multistakeholder Committee                             | Multistakeholder Committee                         |
| <b>Frequency Of EDL Revision</b>                                    | 1 Year                                                                                | 2 Years                                                             | 1 Year                                                         | 1 Year                                                 | N/A                                                |
| <b>Time For EDL Preparation/ Revision</b>                           | 2-3 Months                                                                            | 7-8 Months                                                          | 2-3 Months                                                     | 4 Months                                               | N/A                                                |
| <b>EDL Categorization</b>                                           | Yes (8 Product Based Categories)                                                      | Yes (2 Demography Based Lists)                                      | Yes (Product Based Categories)                                 | Yes                                                    | N/A                                                |
| <b>Third Party Review Of EDL</b>                                    | No                                                                                    | Yes (By WHO Experts)                                                | No                                                             | No                                                     | N/A                                                |
| <b>Demand Estimation &amp; Forecast</b>                             |                                                                                       |                                                                     |                                                                |                                                        |                                                    |
| <b>Demand Estimation Process</b>                                    | Aggregation Of Facility Indents                                                       | Aggregation Of Facility Indents                                     | Aggregation Of Facility Indents                                | Aggregation Of Facility Indents                        | Aggregation Of Facility Indents                    |
| <b>Frequency Of Demand Estimation</b>                               | 1 Year                                                                                | 1 Year                                                              | 1 Year                                                         | 1 Year                                                 | 1 Year                                             |
| <b>Methodology For Estimation (Facility Level)</b>                  | 10-15% Over Previous Year's Indent; Performed By Pharmacist                           | No Scientific Method; Usually Performed By Computer Operator/ Clerk | 10% Of The Previous Year Consumption                           | N/A                                                    | 10% Of Previous Year Consumption                   |
| <b>Procurement Process</b>                                          |                                                                                       |                                                                     |                                                                |                                                        |                                                    |
| <b>Procurement Mechanism In The State</b>                           | Centralized                                                                           | 80% Centralized, 20% Decentralized                                  | 90% Centralized, 10% Decentralized                             | Centralized                                            | Centralized                                        |
| <b>Financing Of Drug Procurement</b>                                | State Budget Allocation                                                               | State Budget Allocation                                             | State Budget Allocation                                        | State Budget Allocation & User Charges                 | State Budget Allocation                            |
| <b>Emergency Drug Budget Allocation</b>                             | Yes (Additional Funds Released)                                                       | No (Purchased From Existing Budget)                                 | Yes (Additional Funds Released)                                | No                                                     | Yes (Additional Funds Released)                    |
| <b>Tendering Process</b>                                            |                                                                                       |                                                                     |                                                                |                                                        |                                                    |
| <b>Bidding Process</b>                                              | Two Bid System                                                                        | Two Bid System                                                      | Two Bid System                                                 | Two Bid System                                         | Two Bid System                                     |
| <b>Prequalification Criteria</b>                                    |                                                                                       |                                                                     |                                                                |                                                        |                                                    |
| <b>Min. Turnover Criteria (INR/USD)</b>                             | 10 Crore/ 2.1 Million                                                                 | 10 Crore/ 2.1 Million                                               | 2 Crore/ 0.7 Million                                           | 10 Crore/ 2.1 Million                                  | 10 Crore/ 2.1 Million                              |
| <b>GMP/WHO GMP/US FDA</b>                                           | Required                                                                              | Required                                                            | Required                                                       | Required                                               | Required                                           |
| <b>ISI/ BIS/ ISO/ CE</b>                                            | Required                                                                              | Required                                                            | N/A                                                            | Required                                               | Required                                           |
| <b>Assurance Of Available Production Capacity</b>                   | Required (MPMASS)                                                                     | None                                                                | Production Capacity Certificate                                | N/A                                                    | Production Capacity Certificate                    |
| <b>Market Standing</b>                                              | 2 Years                                                                               | 3 Years                                                             | 3 Years                                                        | 2 Years                                                | 3 Years                                            |
| <b>Exclusion Criteria For Factory Inspections</b>                   | Supply To Premier Institutions                                                        | None                                                                | None                                                           | None                                                   | N/A                                                |
| <b>Price Relaxation For SSIs/ PSUs</b>                              | Yes (SSI-10%, PSU-15%)                                                                | Yes (SSI-10%, Additional 2% For ISO Certification)                  | Yes (SSI-15%)                                                  | PSU produced Antibiotics                               | None (20% Quantity Reserved If SSI Mate Rate)      |
| <b>Product Reservation For SSIs/ PSUs</b>                           | None                                                                                  | 31 Items (From SSIs)                                                | None                                                           | None                                                   | None                                               |
| <b>EMD</b>                                                          | 1% Of Tender Value                                                                    | 1-5% Of Tender Value                                                | 1% Of Tender value (maximum upto 50,000 INR); exempted for SSI | Differs For Each Drug                                  | INR 25,000                                         |
| <b>Process For Tenderers With No Bidders (In Order Of Priority)</b> | Re-Tender (Revised Pre-Qualifications); Limited Tender; Short Tender; Direct Purchase | Re-Tender (Same Pre-Qualifications) Open Until Bids Are Received    | Re-tender (Limited and Short tender process is used)           | Pharmacy Based Purchasing                              | Re-Tendering; Limited Tendering Or Direct Purchase |

Formatted: Width: 8.26", Height: 11.69"

Formatted Table

Formatted: Font: +Body (Cambria), 12 pt

Formatted: Left, Space After: 0 pt

Formatted: Font: +Body (Cambria), 12 pt

Formatted: Left, Space After: 0 pt

Formatted: Font: +Body (Cambria), 12 pt, Not Bold

Formatted: Left, Space After: 0 pt

Formatted: Font: +Body (Cambria), 12 pt, Not Bold

Formatted: Left, Space After: 0 pt

Formatted: Font: +Body (Cambria), 12 pt

Formatted: Left, Space After: 0 pt

1  
2  
3  
4  
5  
6  
7  
8  
9  
10  
11  
12  
13  
14  
15  
16  
17  
18  
19  
20  
21  
22  
23  
24  
25  
26  
27  
28  
29  
30  
31  
32  
33  
34  
35  
36  
37  
38  
39  
40  
41  
42  
43  
44  
45  
46  
47  
48  
49  
50  
51  
52  
53  
54  
55  
56  
57  
58  
59  
60

|                                                                                    |                                                                                                                       |                                                                       |                                                                                                                                    |                                                                                                                                    |                                                           |
|------------------------------------------------------------------------------------|-----------------------------------------------------------------------------------------------------------------------|-----------------------------------------------------------------------|------------------------------------------------------------------------------------------------------------------------------------|------------------------------------------------------------------------------------------------------------------------------------|-----------------------------------------------------------|
| Supply Schedule                                                                    | 60 Days – 40% Of PO Quantity, 90 Days – 70%, 120 Days – 100%                                                          | 60 Days – 50% Of PO Quantity, Rest Before Specified Date              | Starting from 30 days and has to end by 60 days, otherwise specified                                                               | 30 days to 3 months from the time of issue of PO                                                                                   | Within 3 Months From Issue Of PO                          |
| Quality Control                                                                    |                                                                                                                       |                                                                       |                                                                                                                                    |                                                                                                                                    |                                                           |
| External Quality Testing Of Every Consignment                                      | Empanelled Private Labs                                                                                               | No External Quality Testing (Supplier's Internal Quality Certificate) | Empanelled Private and government labs                                                                                             |                                                                                                                                    |                                                           |
| Testing Before Distribution                                                        | Mandatory                                                                                                             | Not Mandatory                                                         | Mandatory                                                                                                                          | Mandatory                                                                                                                          | Not Mandatory                                             |
| Lead Time For Quality Testing                                                      | ≈ 15 Days                                                                                                             | Within 8 Weeks                                                        | 15 Days For Tablets And Capsules, 1 Month For Suspensions                                                                          | 1 Month                                                                                                                            | N/A                                                       |
| Payment Mechanism                                                                  |                                                                                                                       |                                                                       |                                                                                                                                    |                                                                                                                                    |                                                           |
| Payment Department Status                                                          | Autonomous (Managed By Contractual Staff)                                                                             | Government (Account General's Office)                                 | Autonomous (Managed By Contractual Staff) IT enabled                                                                               |                                                                                                                                    |                                                           |
| Lead Time For Payment                                                              | ≈ 30 Days                                                                                                             | ≈ 90 Days                                                             | 30 Days                                                                                                                            | Min. 30 Days                                                                                                                       | ≈ 90 Days                                                 |
| Prerequisites For Payment Disbursement                                             | Warehouse Material Receipt, External Quality Certificate                                                              | Warehouse Material Receipt, Supplier's Internal Quality Certificate   | Warehouse Material Receipt, External Quality Certificate                                                                           | Warehouse Material Receipt, Quality Certificates From Labs                                                                         | Facility Material Receipt, Internal Quality Certificate   |
| Inventory Mgmt & Distribution                                                      |                                                                                                                       |                                                                       |                                                                                                                                    |                                                                                                                                    |                                                           |
| Facilities (All) Catered To Per Warehouse (Average)                                | ≈ 298                                                                                                                 | ≈ 235                                                                 | ≈ 414                                                                                                                              |                                                                                                                                    |                                                           |
| Scientific Warehousing Practices In-House/ Outsourced Supply Chain Management      | Yes                                                                                                                   | No                                                                    | Yes                                                                                                                                | No                                                                                                                                 | No                                                        |
| Inventory Management                                                               | Outsourced                                                                                                            | In-House                                                              | In-House                                                                                                                           | In-House                                                                                                                           | In-House (Facility Level)                                 |
| Scientific Consumption/ Inventory Forecasting                                      | Dynamic (Flexibility Of 2nd PO)                                                                                       | Static (Only Single PO Is Issued)                                     | Dynamic (Flexibility Of 2nd PO)                                                                                                    | Static                                                                                                                             | 25% Flexibility For Quality Maintained                    |
| Flexibility For Facilities To Alter Indent                                         | Yes (Just Before Dispatch)                                                                                            | No                                                                    | Yes                                                                                                                                | Yes                                                                                                                                | No                                                        |
| Tracking Dispatched/ Delivered Drugs (Scientific) Inventory Management At Facility | Yes (Inventory Management Software)                                                                                   | No                                                                    | Yes (Inventory Management Software)                                                                                                | No                                                                                                                                 | No                                                        |
| Penalty                                                                            |                                                                                                                       |                                                                       |                                                                                                                                    |                                                                                                                                    |                                                           |
| Penalty For Supply Schedule Default                                                | Currently Passbook (Volume Based, Online In Future)                                                                   | No Tracking                                                           | Passbook (Value Based)                                                                                                             | N/A                                                                                                                                | No                                                        |
| Penalty For Quality Failure                                                        | No (Online In Future)                                                                                                 | No                                                                    | Use First in First Out (FIFO) principle                                                                                            | No                                                                                                                                 | No                                                        |
| Penalty For Supply Schedule Default                                                | 10% Of The Unexecuted Supply, Unexecuted Supply Purchased At The Cost Of Supplier In Case Of Inability To Supply      | N/A                                                                   | 0.5% per day to maximum of 15% of the tender amount                                                                                |                                                                                                                                    | Which Unexecuted Supply Purchased At The Cost Of Supplier |
| Penalty For Quality Failure                                                        | Supplier Blacklisted With Forfeiture Of Security Deposit                                                              | Suppliers Have To Replace The Entire PO Quantity Or Risk Blacklisting | Supplier Blacklisted With Forfeiture Of Security Deposit                                                                           | Forfeiture Of EMD                                                                                                                  | Supplier Blacklisted With Forfeiture Of Security Deposit  |
| Blacklisting Criteria                                                              | Defaulting On 3 POs Or More With Less Than 50% Supply, Blacklisted By Any Other Procurement Agency On Quality Grounds | Quality Failure After Material Supply                                 | Defaulting Continuously on 3 POs With Less Than 50% Supply, Quality Failure, Blacklisted By National Or Other State Level Agencies | Defaulting Continuously on 3 POs With Less Than 50% Supply, Quality Failure, Blacklisted By National Or Other State Level Agencies | Supply Default After Extension Period, Quality Failure    |
| IT-Enablement Processes:                                                           |                                                                                                                       |                                                                       |                                                                                                                                    |                                                                                                                                    |                                                           |
| Demand Estimation & Forecasting                                                    | Yes                                                                                                                   | No                                                                    | Yes                                                                                                                                |                                                                                                                                    |                                                           |

Formatted: Font: +Body (Cambria), 12 pt, Not Bold  
Formatted: Left, Space After: 0 pt

Formatted: Font: +Body (Cambria), 12 pt, Not Bold  
Formatted: Left, Space After: 0 pt

Formatted: Font: +Body (Cambria), 12 pt  
Formatted: Left, Space After: 0 pt

Formatted: Font: +Body (Cambria), 12 pt, Not Bold  
Formatted: Left, Space After: 0 pt

Formatted: Font: +Body (Cambria), 12 pt  
Formatted: Left, Space After: 0 pt

1  
2  
3  
4  
5  
6  
7  
8  
9  
10  
11  
12  
13  
14  
15  
16  
17  
18  
19  
20  
21  
22  
23  
24  
25  
26  
27  
28  
29  
30  
31  
32  
33  
34  
35  
36  
37  
38  
39  
40  
41  
42  
43  
44  
45  
46  
47  
48  
49  
50  
51  
52  
53  
54  
55  
56  
57  
58  
59  
60

|                                  |     |     |     |    |     |
|----------------------------------|-----|-----|-----|----|-----|
| Tendering Process                | Yes | No  | Yes | No | Yes |
| Quality Control                  |     | No  | Yes | No | No  |
| Payment Disbursement             | Yes | No  | Yes | No | No  |
| Inventory Management (Warehouse) | Yes | Yes | Yes | No | No  |
| Inventory Management (Facility)  | No  | No  | Yes | No | No  |

Formatted: Font: +Body (Cambria), 12 pt  
Formatted: Left, Space After: 0 pt

**Annexure 2**

| Name of Drug      | Dosage              | Unit    | Price (INR) |                 |             |                  |             |
|-------------------|---------------------|---------|-------------|-----------------|-------------|------------------|-------------|
|                   |                     |         | Kerala 2012 | Tamil Nadu 2012 | Odisha 2009 | Maharashtra 2011 | Punjab 2010 |
| Adrenaline        | 1mg/1 ml            | Ampoule | 2.80        | 1.21            | 1.46        | 1.80             | n/a         |
| Albendazole       | 400 mg              | Tablet  | 0.81        | 0.57            | 0.49        | 0.61             | 0.64        |
| Aminophylline     | 25 mg/ml            | Ampoule | n/a         | 2.60            | 2.91        | 4.90             | n/a         |
| Amitriptyline     | 25 mg               | Tablet  | 0.22        | 0.15            | 0.15        | 0.19             | n/a         |
| Amlodipine        | 5 mg                | Tablet  | 0.16        | 0.06            | 0.09        | 0.10             | 0.12        |
| Atenolol          | 50 mg               | Tablet  | 0.125       | 0.11            | 0.12        | 0.14             | 0.14        |
| Benzyl Penicillin | 10 Lakh IU          | Vial    | 3.68        | 3.08            | 4.20        | 4.88             | n/a         |
| Carbamazepine     | 200 mg              | Tablet  | 0.59        | 0.54            | 0.42        | 0.53             | n/a         |
| Cefotaxime        | 250 mg              | Vial    | 4.73        | 3.94            | 5.40        | 5.14             | n/a         |
| Ciprofloxacin     | 500 mg              | Tablet  | 1.09        | 1.04            | 0.87        | 1.07             | 1.86        |
| Co-trimoxazole    | 40mg+ 200mg per 5ml | Bottle  | n/a         | 5.91            | 5.90        | 6.74             | n/a         |

Formatted: List Paragraph, Bulleted + Level: 1 + Aligned at: 0.25" + Indent at: 0.5"



1  
2  
3  
4  
5  
6  
7  
8  
9  
10  
11  
12  
13  
14  
15  
16  
17  
18  
19  
20  
21  
22  
23  
24  
25  
26  
27  
28  
29  
30  
31  
32  
33  
34  
35  
36  
37  
38  
39  
40  
41  
42  
43  
44  
45  
46  
47  
48  
49  
50  
51  
52  
53  
54  
55  
56  
57  
58  
59  
60

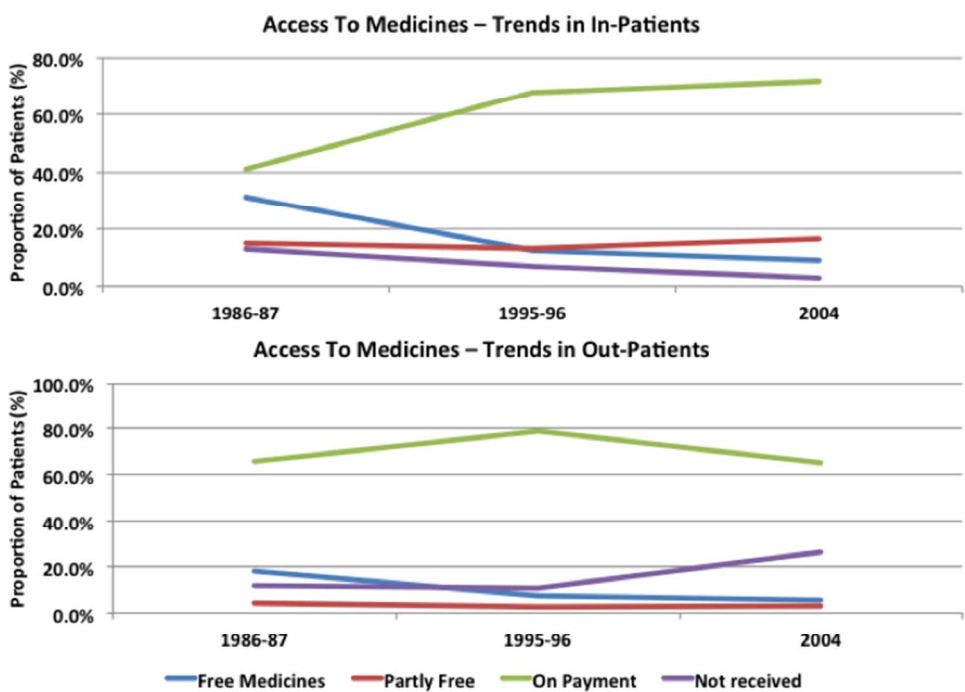

Source: Health data extracted from National Sample Survey Rounds 60, 52, and 42

Review only

1  
2  
3  
4  
5  
6  
7  
8  
9  
10  
11  
12  
13  
14  
15  
16  
17  
18  
19  
20  
21  
22  
23  
24  
25  
26  
27  
28  
29  
30  
31  
32  
33  
34  
35  
36  
37  
38  
39  
40  
41  
42  
43  
44  
45  
46  
47  
48  
49  
50  
51  
52  
53  
54  
55  
56  
57  
58  
59  
60



Source: Report of National Commission on Macroeconomics and Health, GOI 2005

For peer review only

|                                                |                                                                                                                                                                                                                                                                                              |
|------------------------------------------------|----------------------------------------------------------------------------------------------------------------------------------------------------------------------------------------------------------------------------------------------------------------------------------------------|
| <b>Overall</b>                                 | <ul style="list-style-type: none"> <li>• <i>Legal Status of the Procurement Organization; Drug Procurement Budget; Per Capita Drug Procurement Budget;</i></li> </ul>                                                                                                                        |
| <b>Essential Drug List</b>                     | <ul style="list-style-type: none"> <li>• <i>EDL Customization; EDL Committee Composition; Frequency of EDL Revision; Time for EDL Preparation/ Revision; EDL Categorization; Third Party Review of EDL</i></li> </ul>                                                                        |
| <b>Demand Estimation &amp; Forecast</b>        | <ul style="list-style-type: none"> <li>• <i>Demand Estimation Process; Frequency of Demand Estimation; Methodology for Estimation (Facility Level)</i></li> </ul>                                                                                                                            |
| <b>Procurement Process</b>                     | <ul style="list-style-type: none"> <li>• <i>Procurement mechanism in the state; Financing of Drug Procurement; Emergency Drug Budget Allocation; Bidding Process</i></li> </ul>                                                                                                              |
| <b>Prequalification Criteria</b>               | <ul style="list-style-type: none"> <li>• <i>Min. Turnover Criteria; GMP/WHO-GMP/US-FDA; ISI/BIS/ISO/CE; Assurance of avbl. Production Capacity; Market Standing; Exclusion Criteria; Price Relaxation; Product Reservation; EMD (%); Tenders with no bidders; Supply Schedule</i></li> </ul> |
| <b>Quality Control</b>                         | <ul style="list-style-type: none"> <li>• <i>External Quality Testing Of Every Consignment; Testing Before Distribution; Testing Before Distribution</i></li> </ul>                                                                                                                           |
| <b>Payment Mechanism</b>                       | <ul style="list-style-type: none"> <li>• <i>Payment Department Status; Lead Time For Payment; Prerequisites For Payment Disbursement</i></li> </ul>                                                                                                                                          |
| <b>Inventory Management &amp; Distribution</b> | <ul style="list-style-type: none"> <li>• <i>Facilities Per Warehouse; Scientific Warehousing Practices; Supply Chain Management; Inventory Management; Scientific Forecasting; Flexibility to Alter Indent; Tracking dispatched drugs; Scientific inventory Mgmt. at Facility</i></li> </ul> |
| <b>Penalties</b>                               | <ul style="list-style-type: none"> <li>• <i>Supply Default; Quality Failure; Blacklisting Criteria</i></li> </ul>                                                                                                                                                                            |
| <b>IT Systems Enablement (of)</b>              | <ul style="list-style-type: none"> <li>• <i>Demand Estimation &amp; Forecasting; Tendering Process; Quality Control; Payment Disbursement; Inventory Management (Warehouse); Inventory Management (Facility)</i></li> </ul>                                                                  |

review only

1  
2  
3  
4  
5  
6  
7  
8  
9  
10  
11  
12  
13  
14  
15  
16  
17  
18  
19  
20  
21  
22  
23  
24  
25  
26  
27  
28  
29  
30  
31  
32  
33  
34  
35  
36  
37  
38  
39  
40  
41  
42  
43  
44  
45  
46  
47  
48  
49  
50  
51  
52  
53  
54  
55  
56  
57  
58  
59  
60



only
